# Supplementary material
Source: Research Square preprint supplement (doi:10.21203/rs.3.rs-9167989/v1)
Supplement: Supplementary file 1 [file 4688234a0ebd351449c16aa7.docx]

**Supplementary Information**


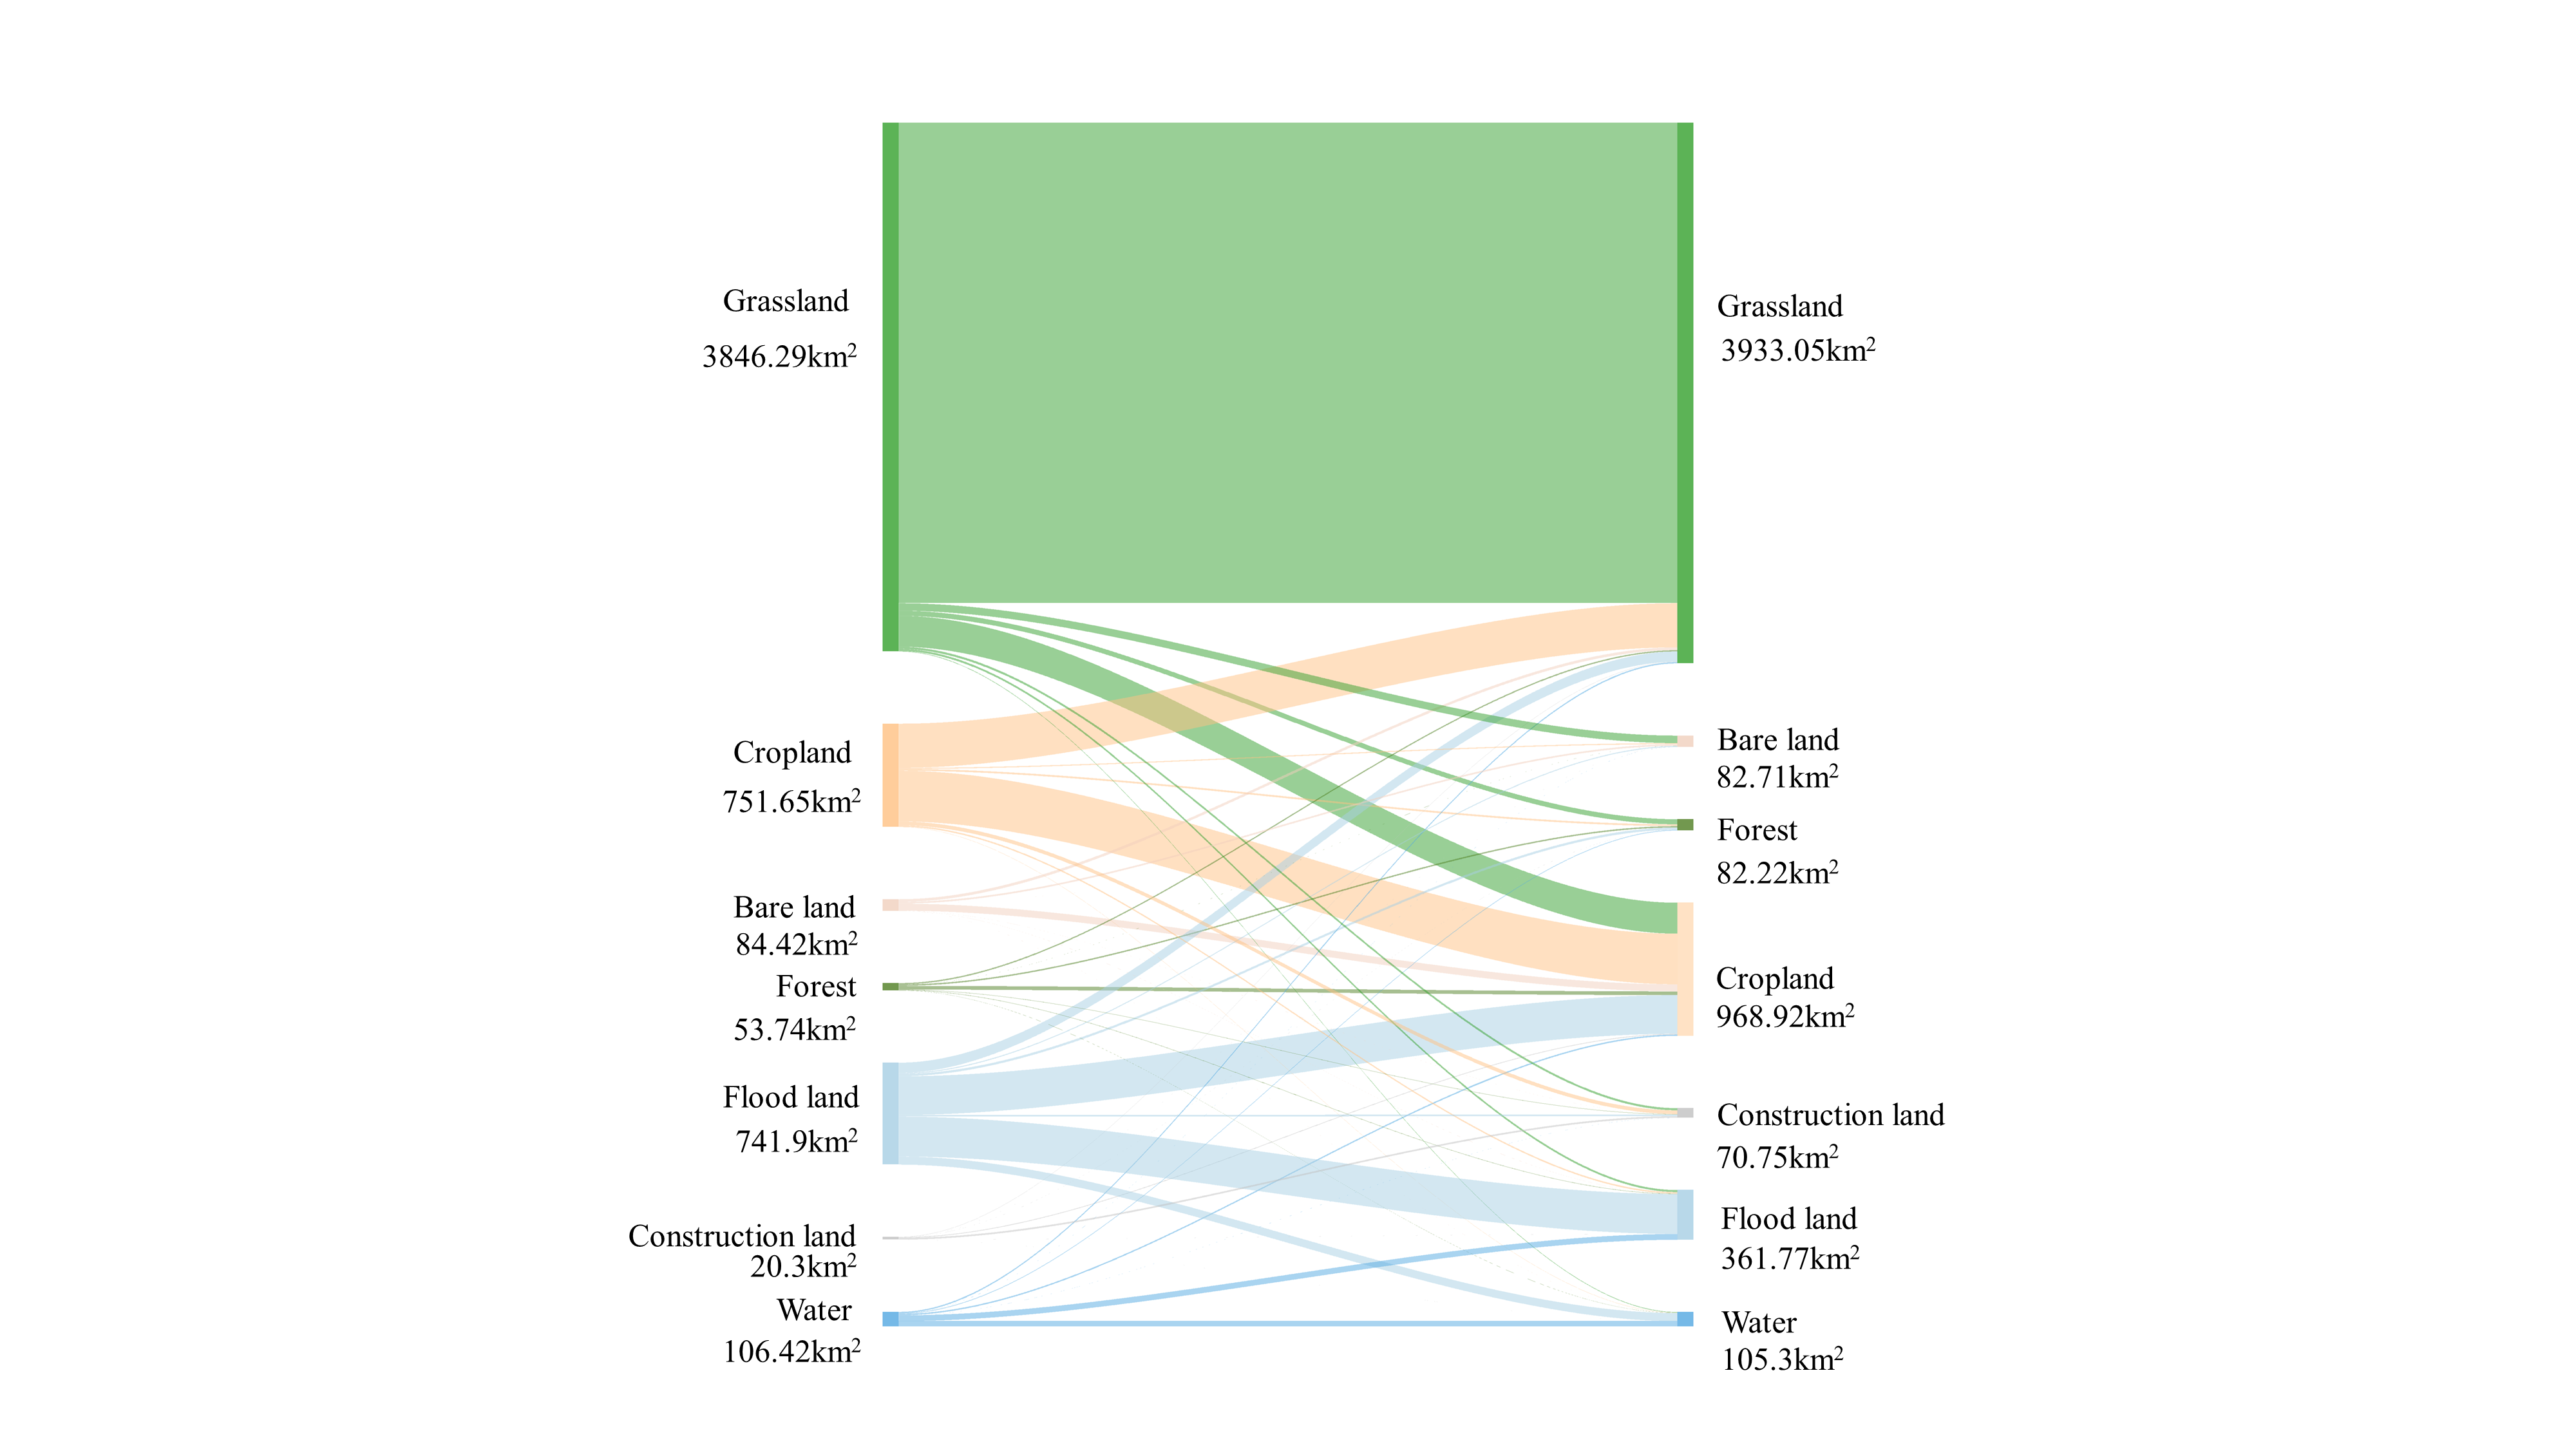


Figure S1: The transferring area of different land-use types in the study area from 2000 to 2021.


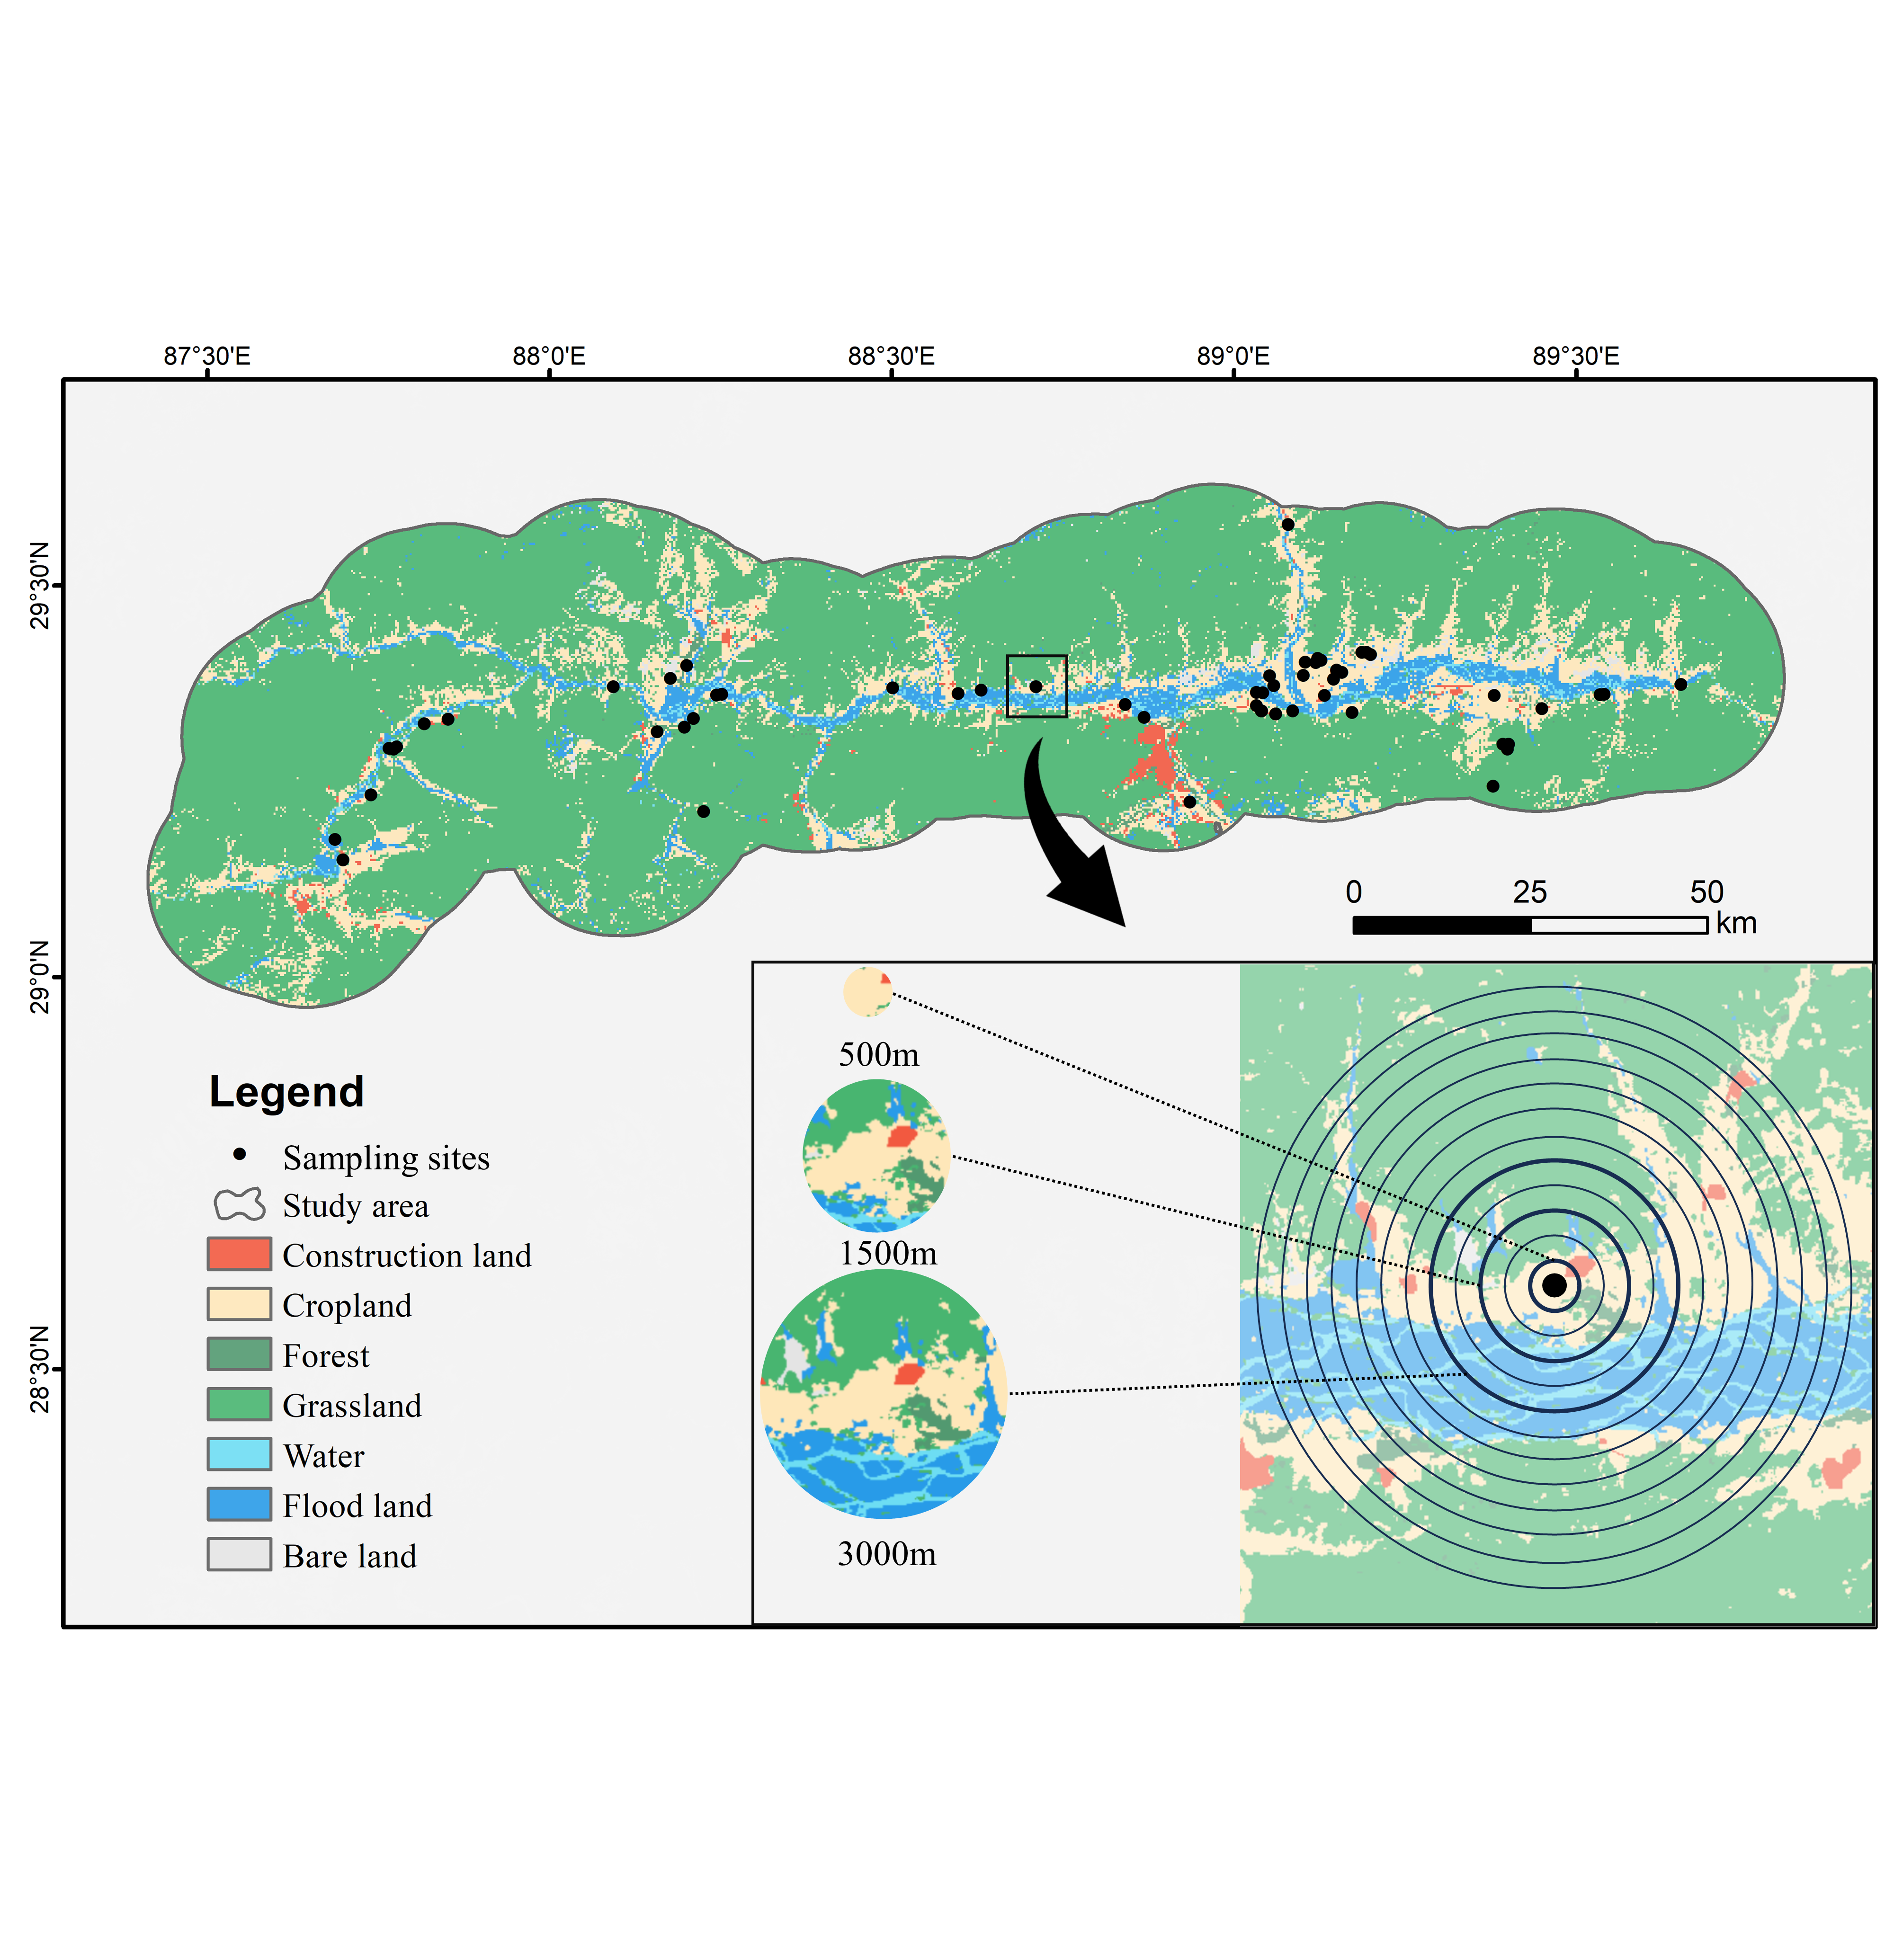


Figure 4. Distribution of the 58 sampling sites of this study with one example of the multiscale matrix partitioning surrounding each sampling site.


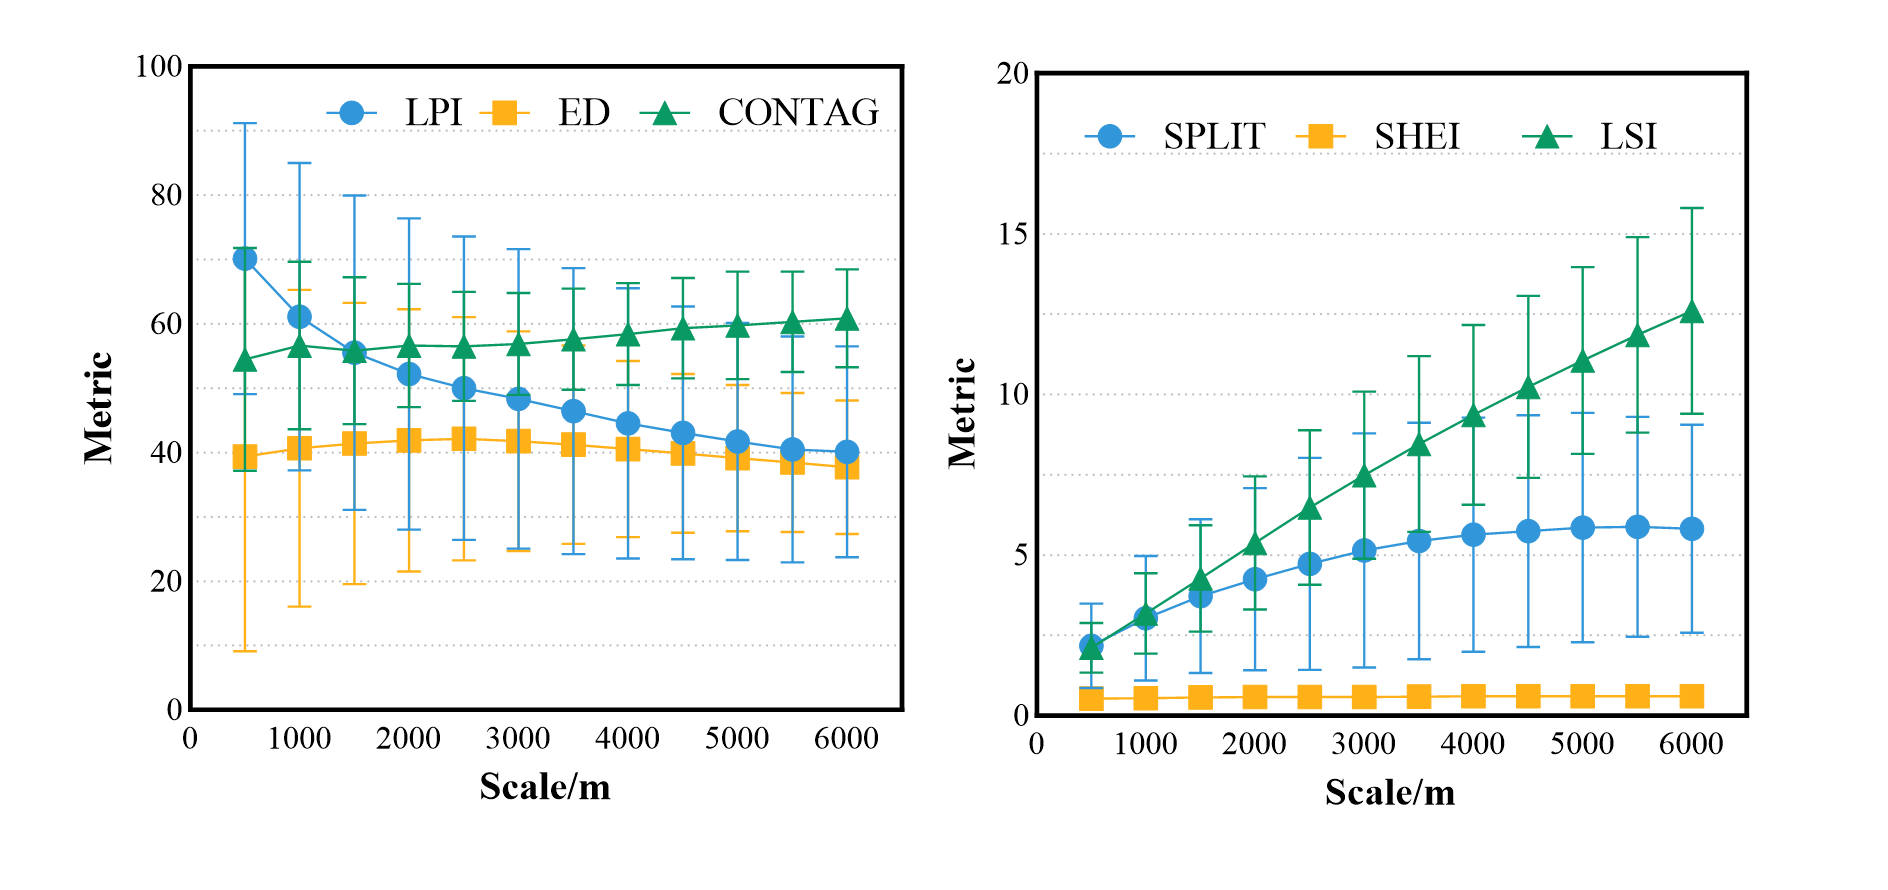


Figure 5. Variations of landscape metrics (landscape level) at different scales.


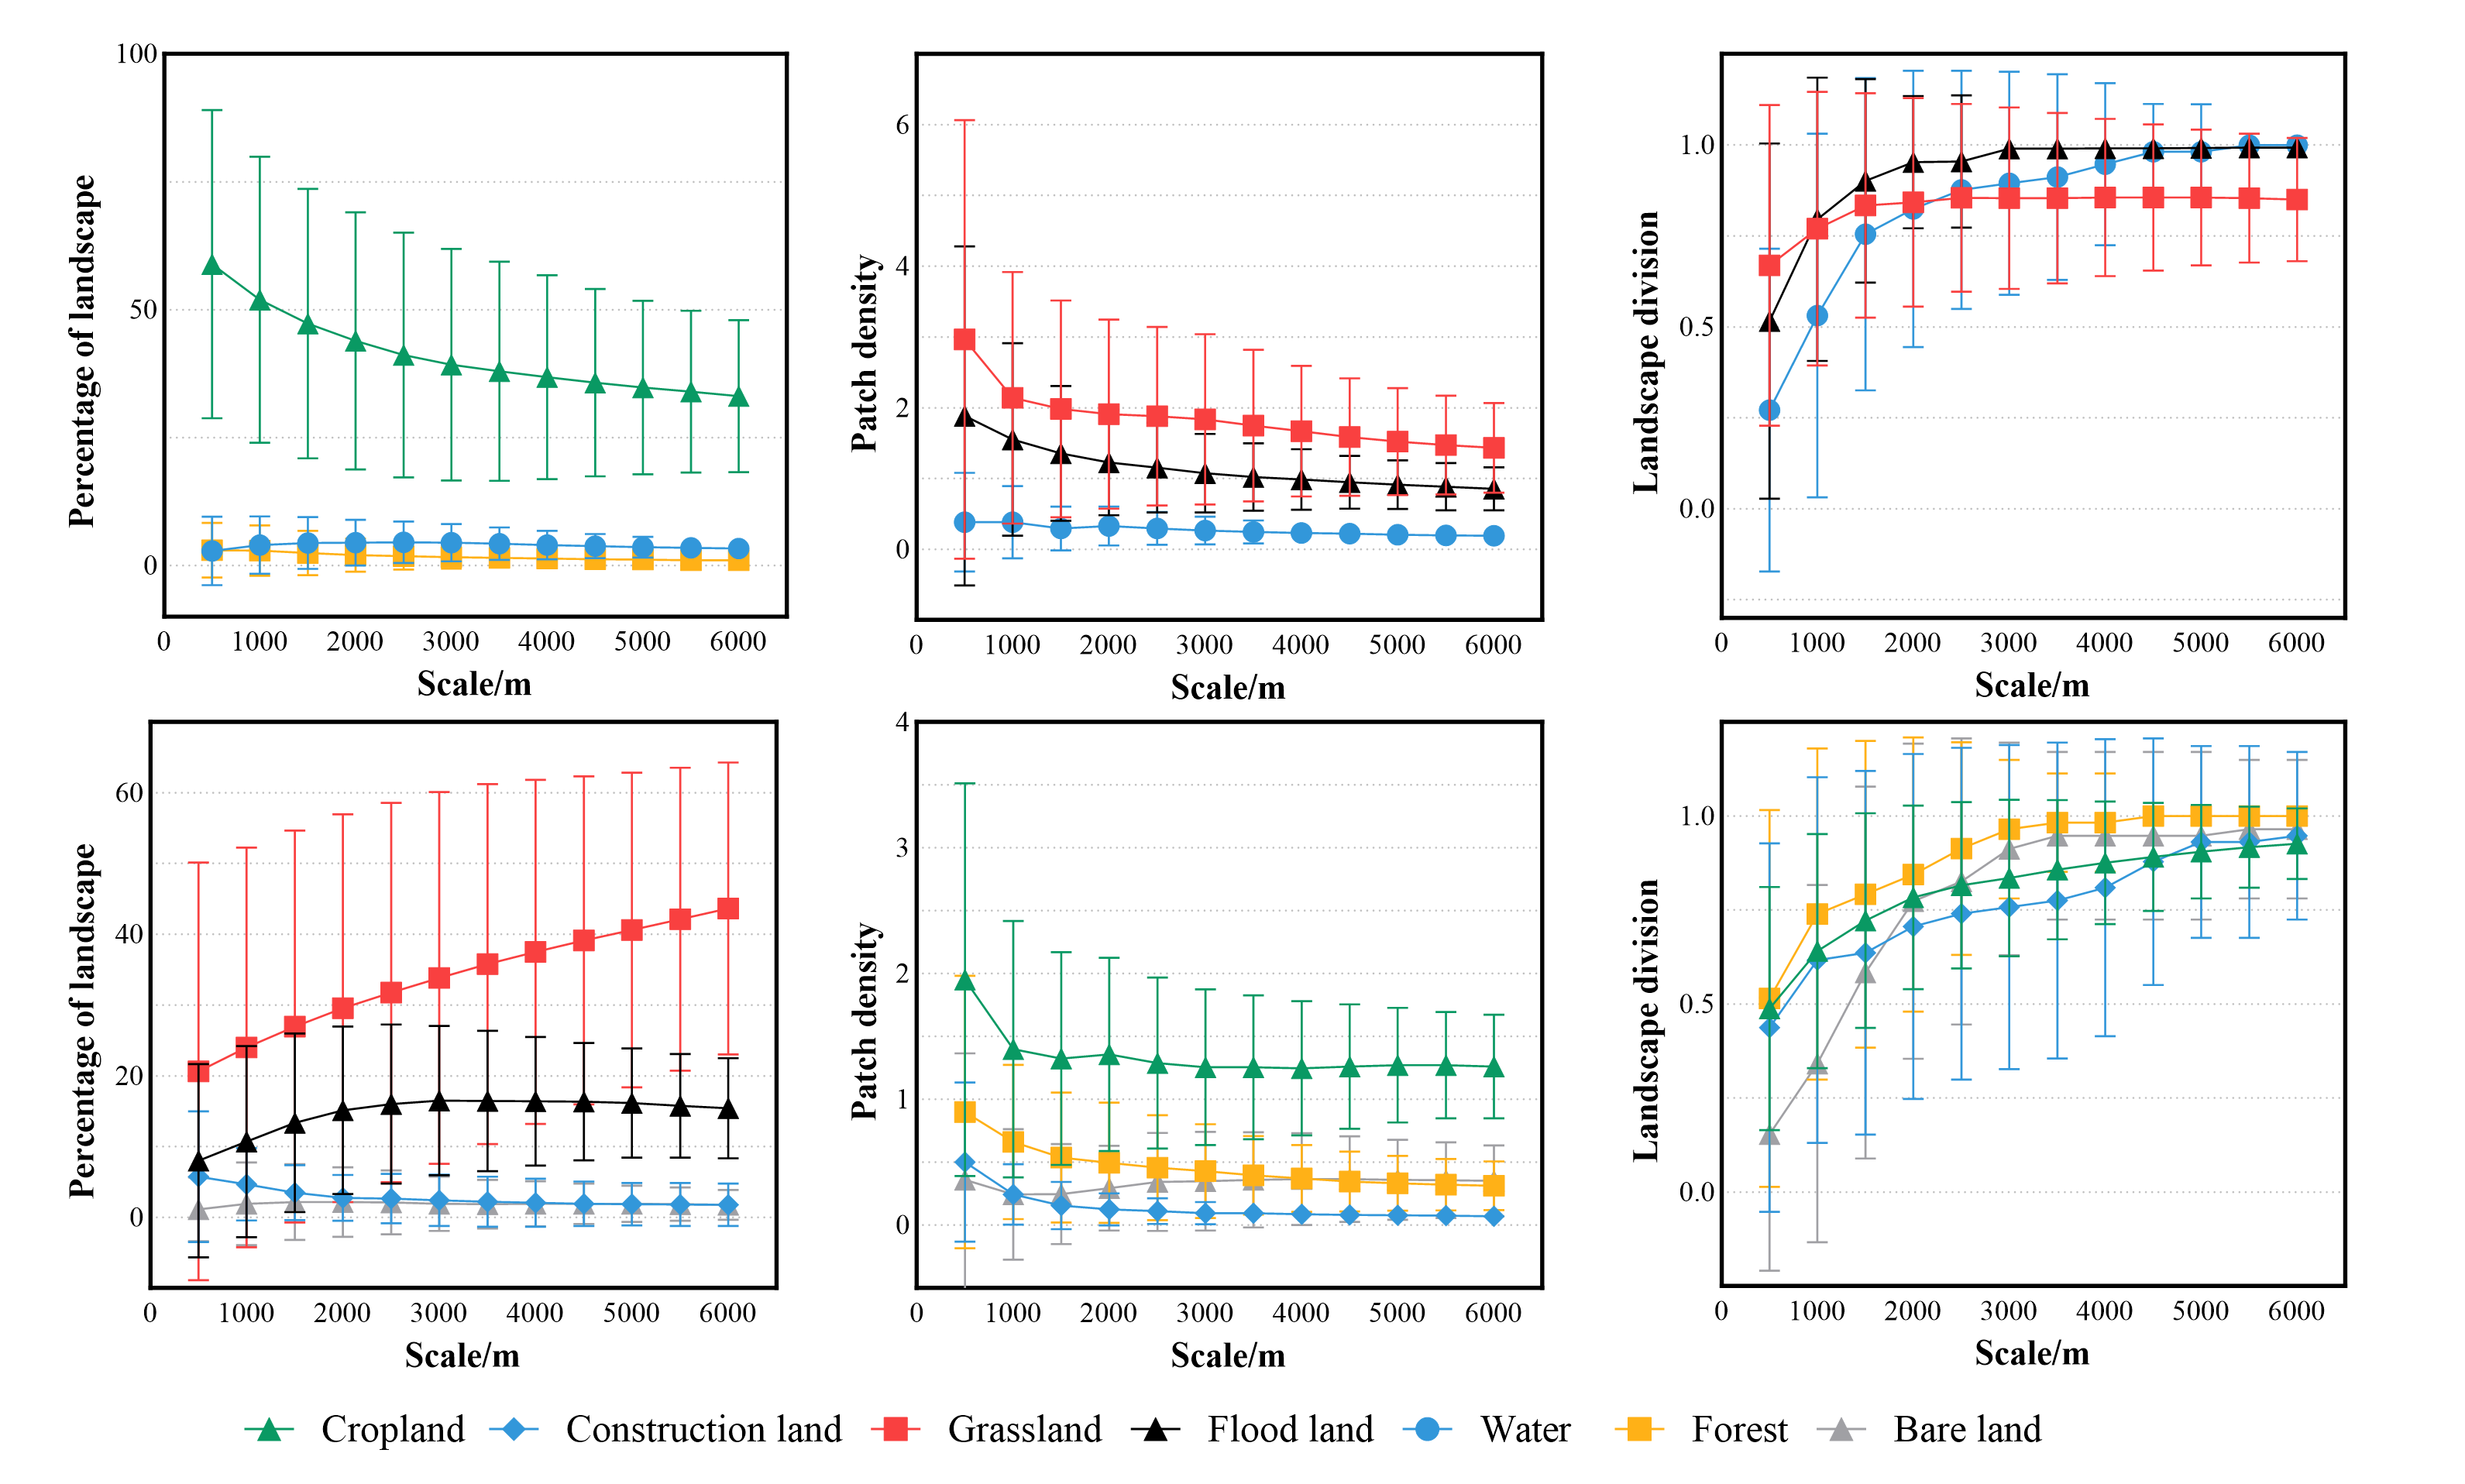


Figure 6. Variations of landscape metrics (class level) at different scales.


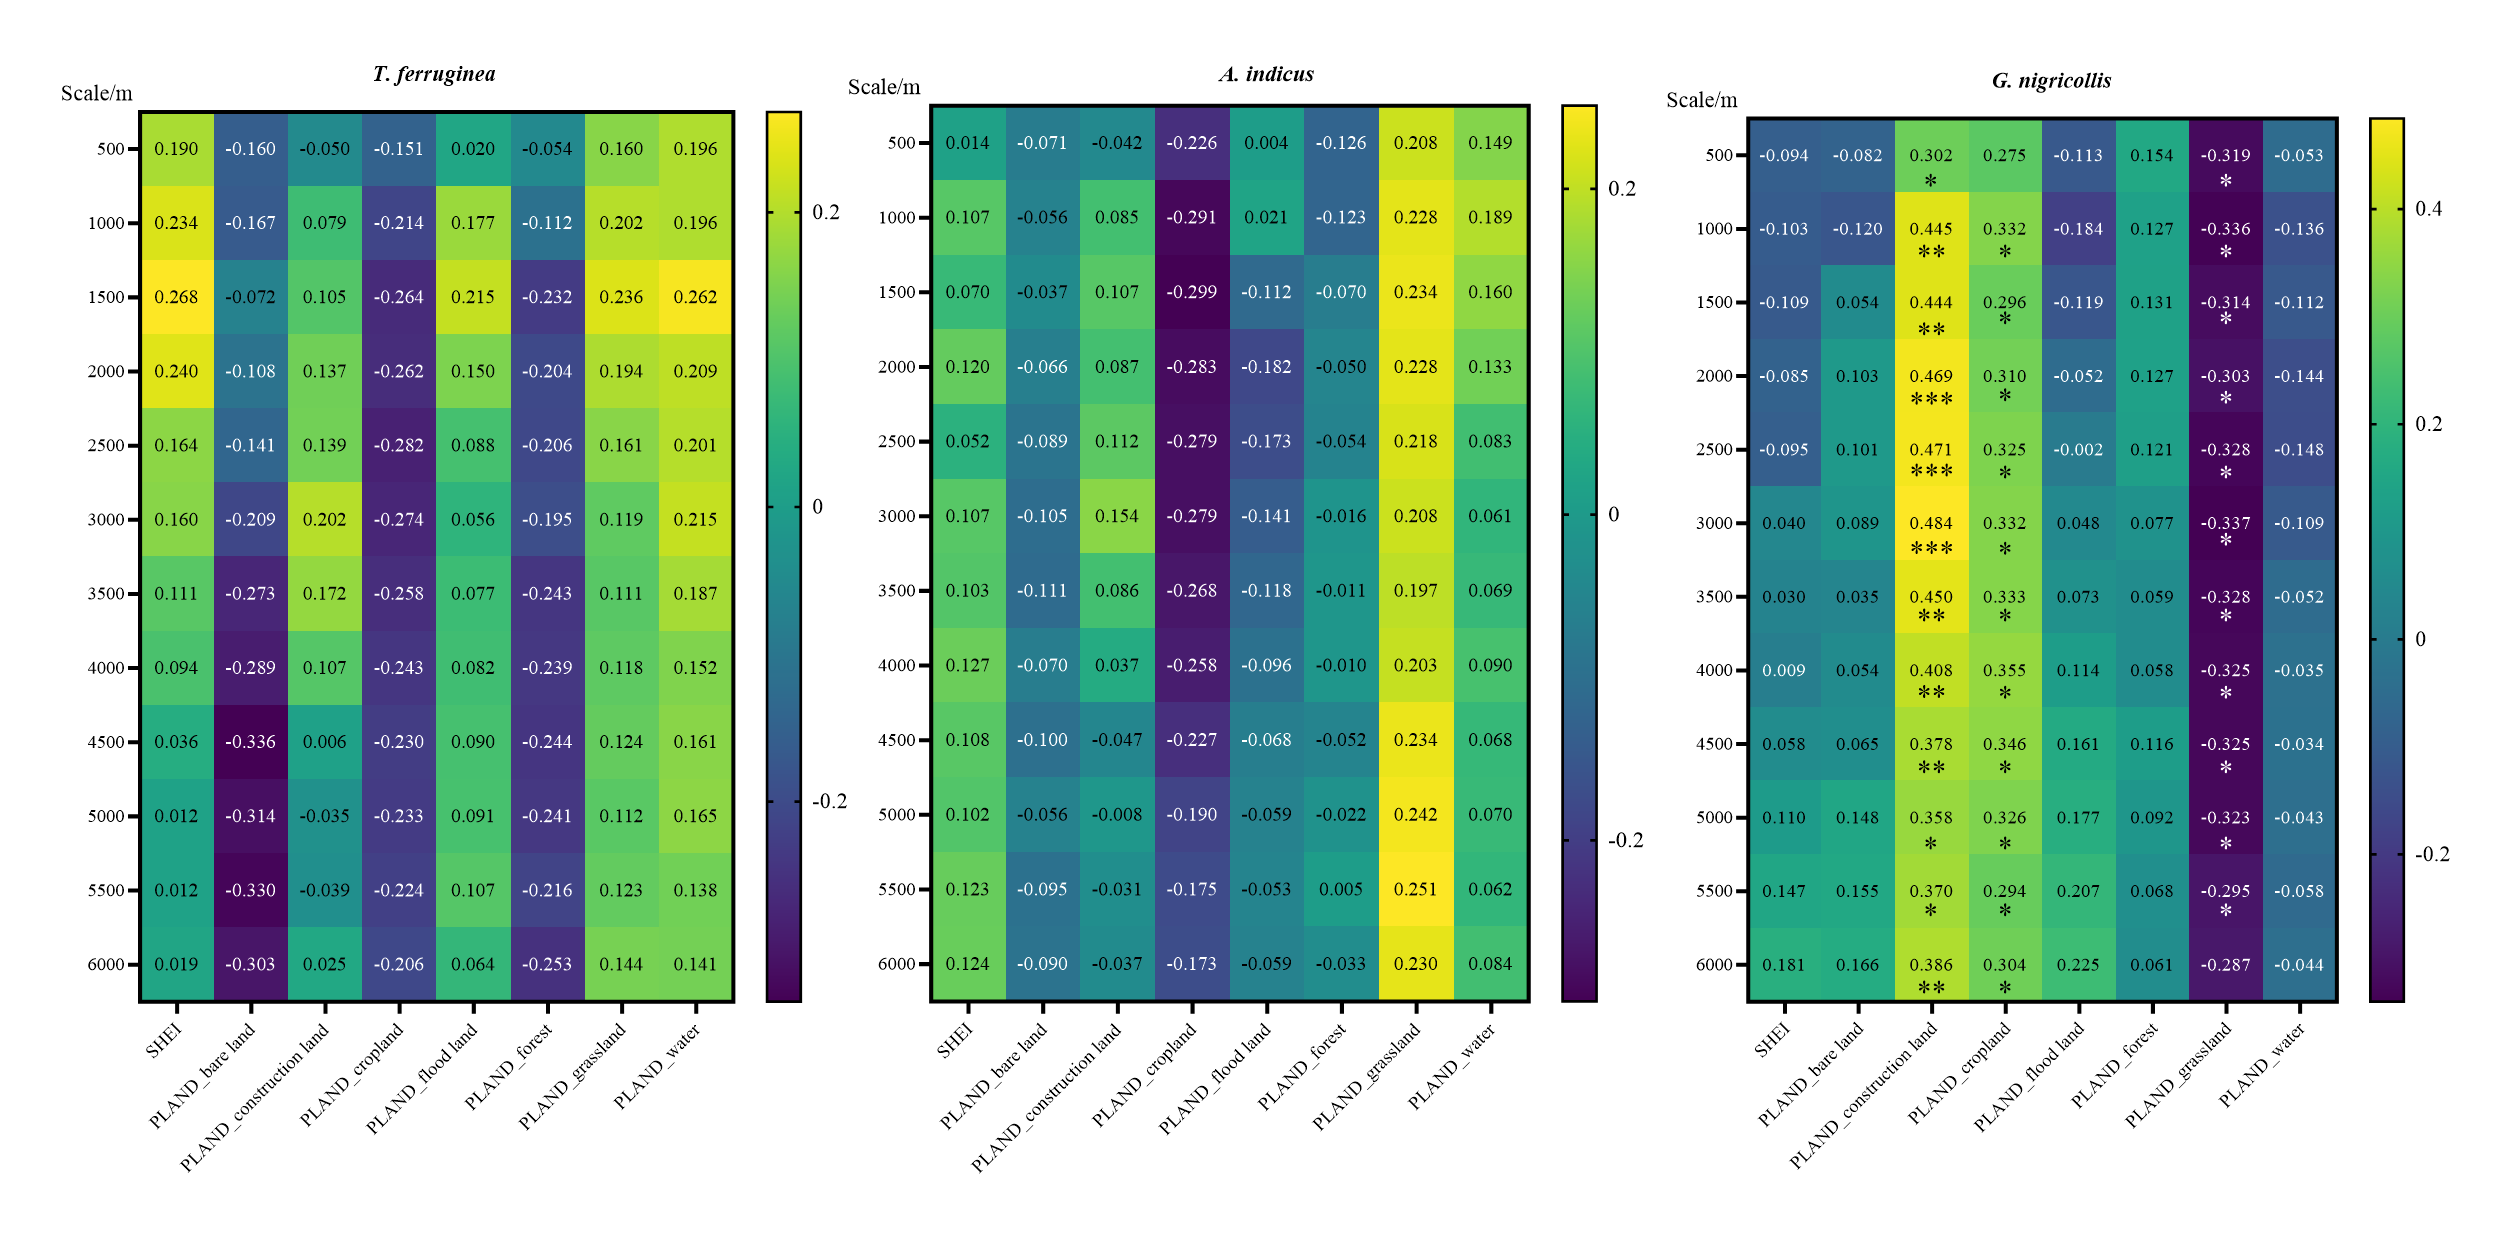


Figure 7. Scale-dependent correlations between abundance of *T. ferruginea*, *A. indicus* and *G. nigricollis* and landscape matrix composition metrics. *: *p* < 0.05; **: *p* < 0.01; ***: *p* < 0.001.


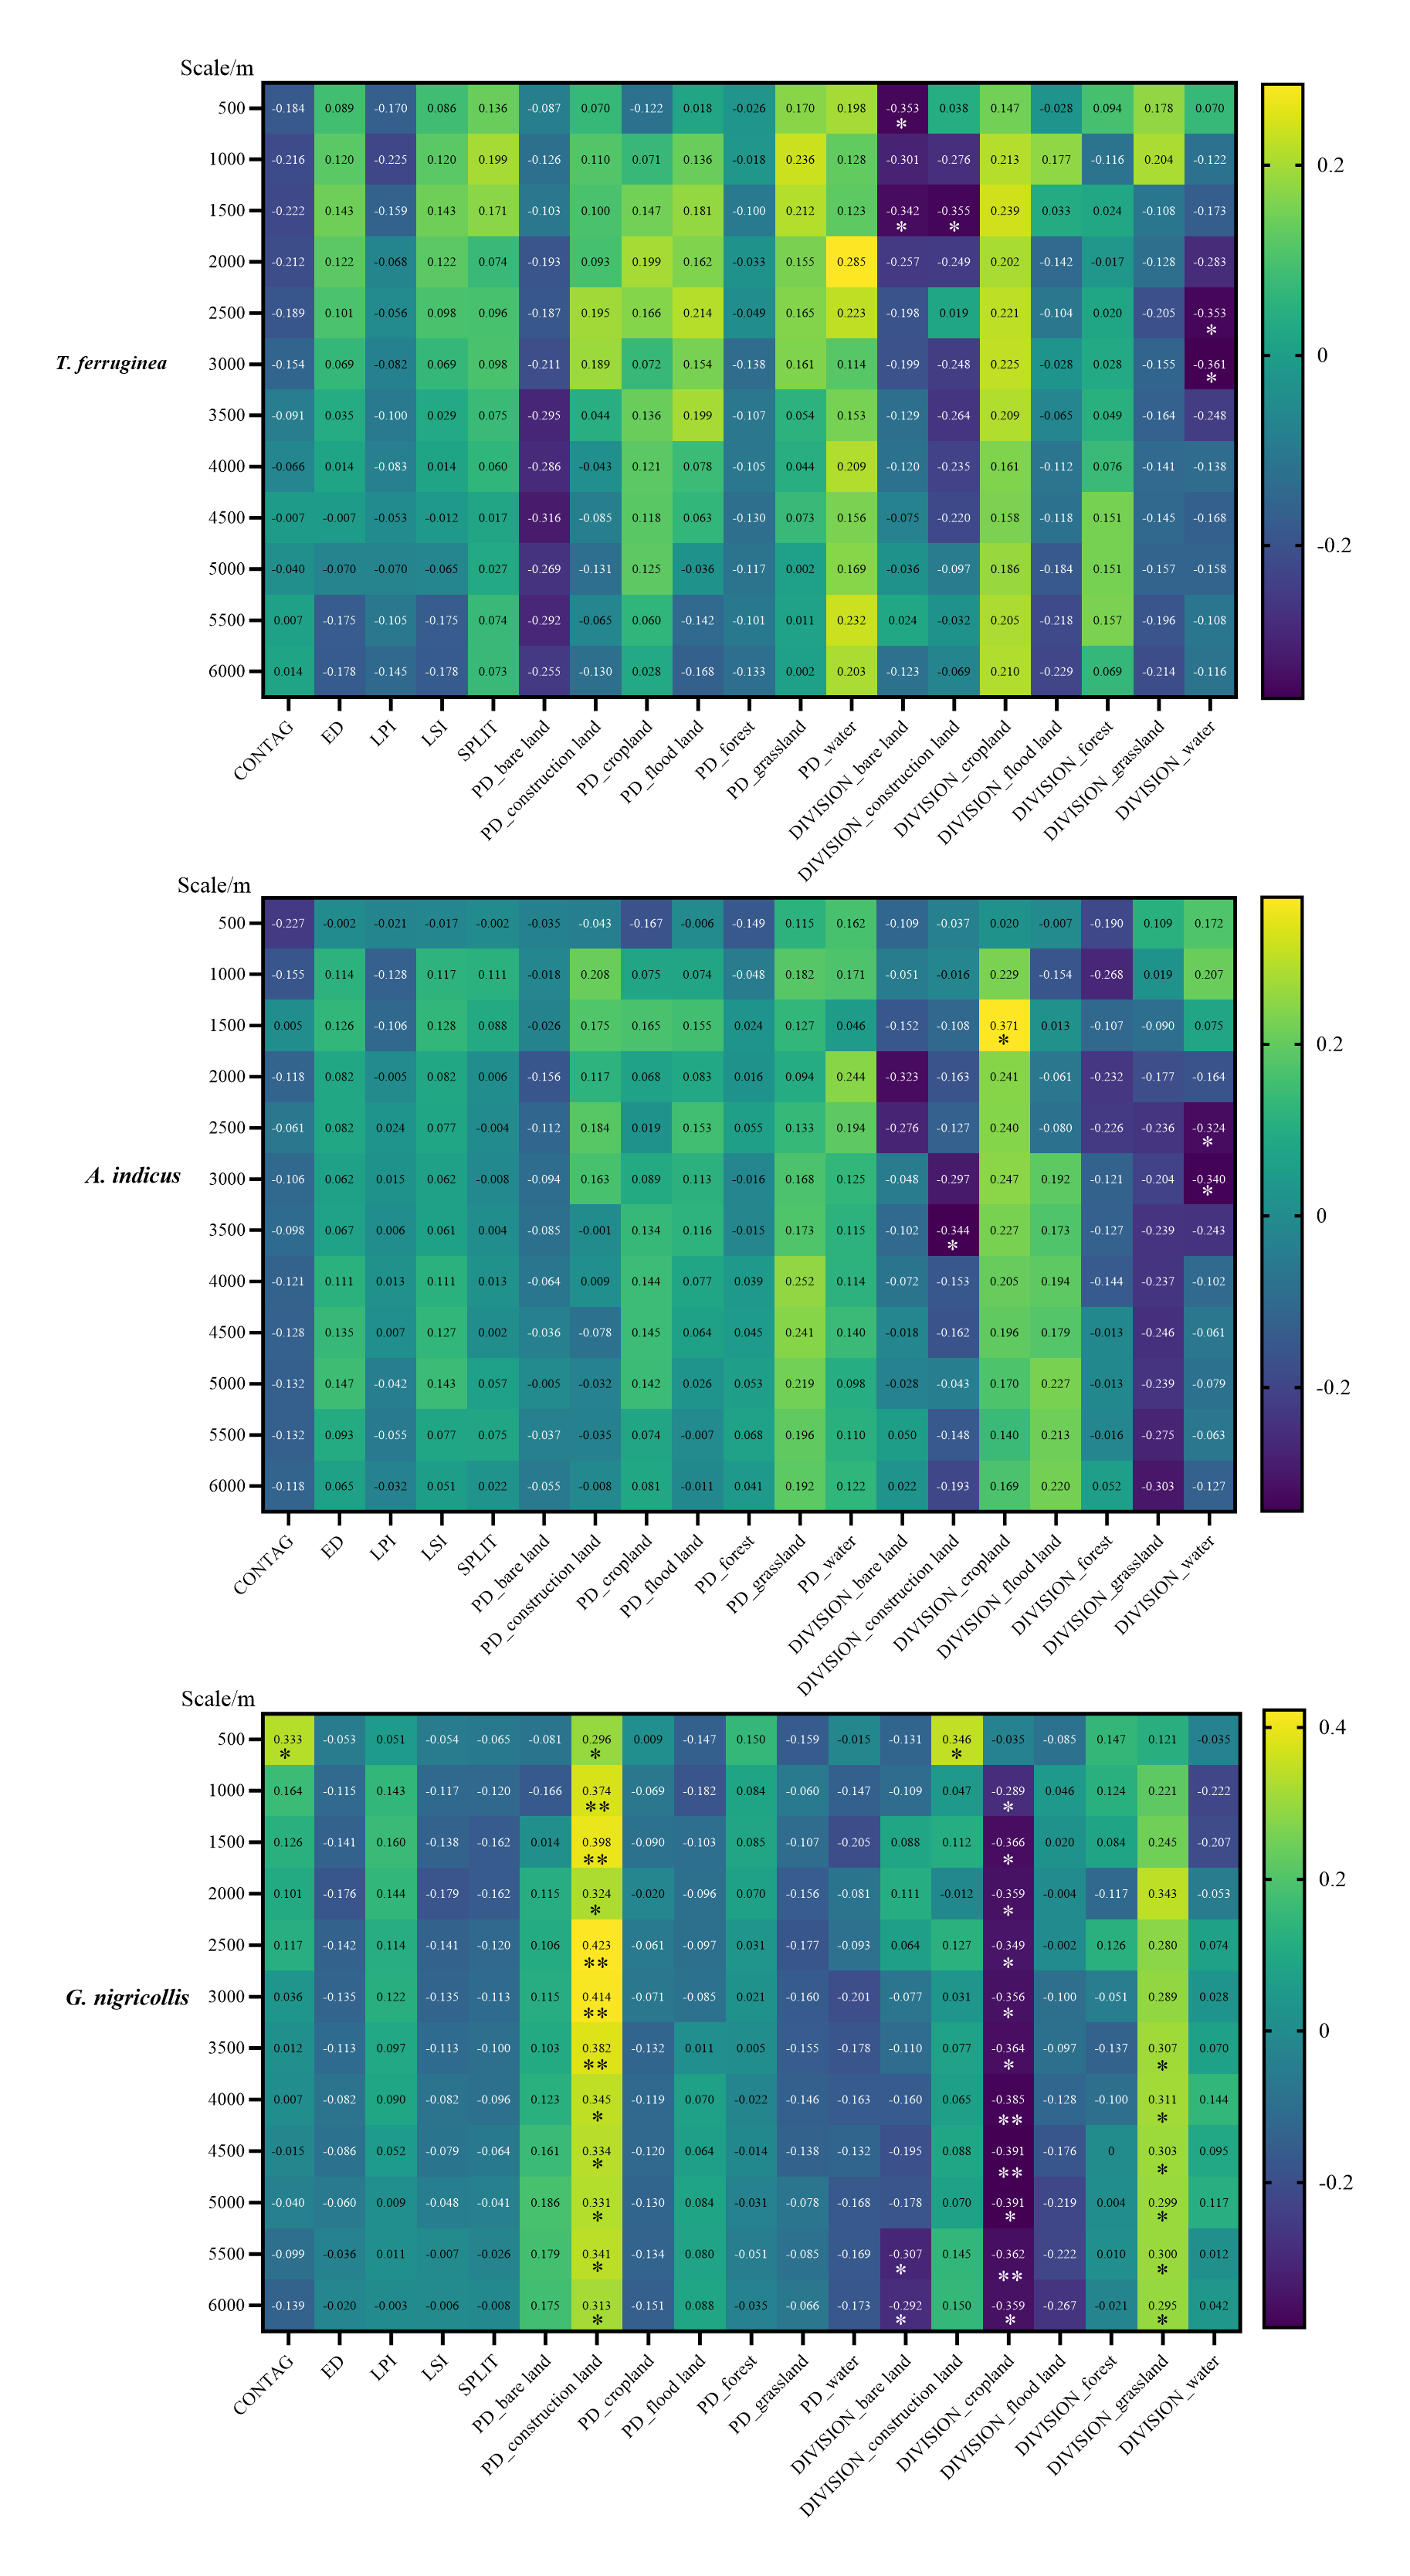


Figure 8. Scale-dependent correlations between abundance of *T. ferruginea*, *A. indicus* and *G. nigricollis* and landscape matrix configuration metrics. *: *p* < 0.05; **: *p* < 0.01.


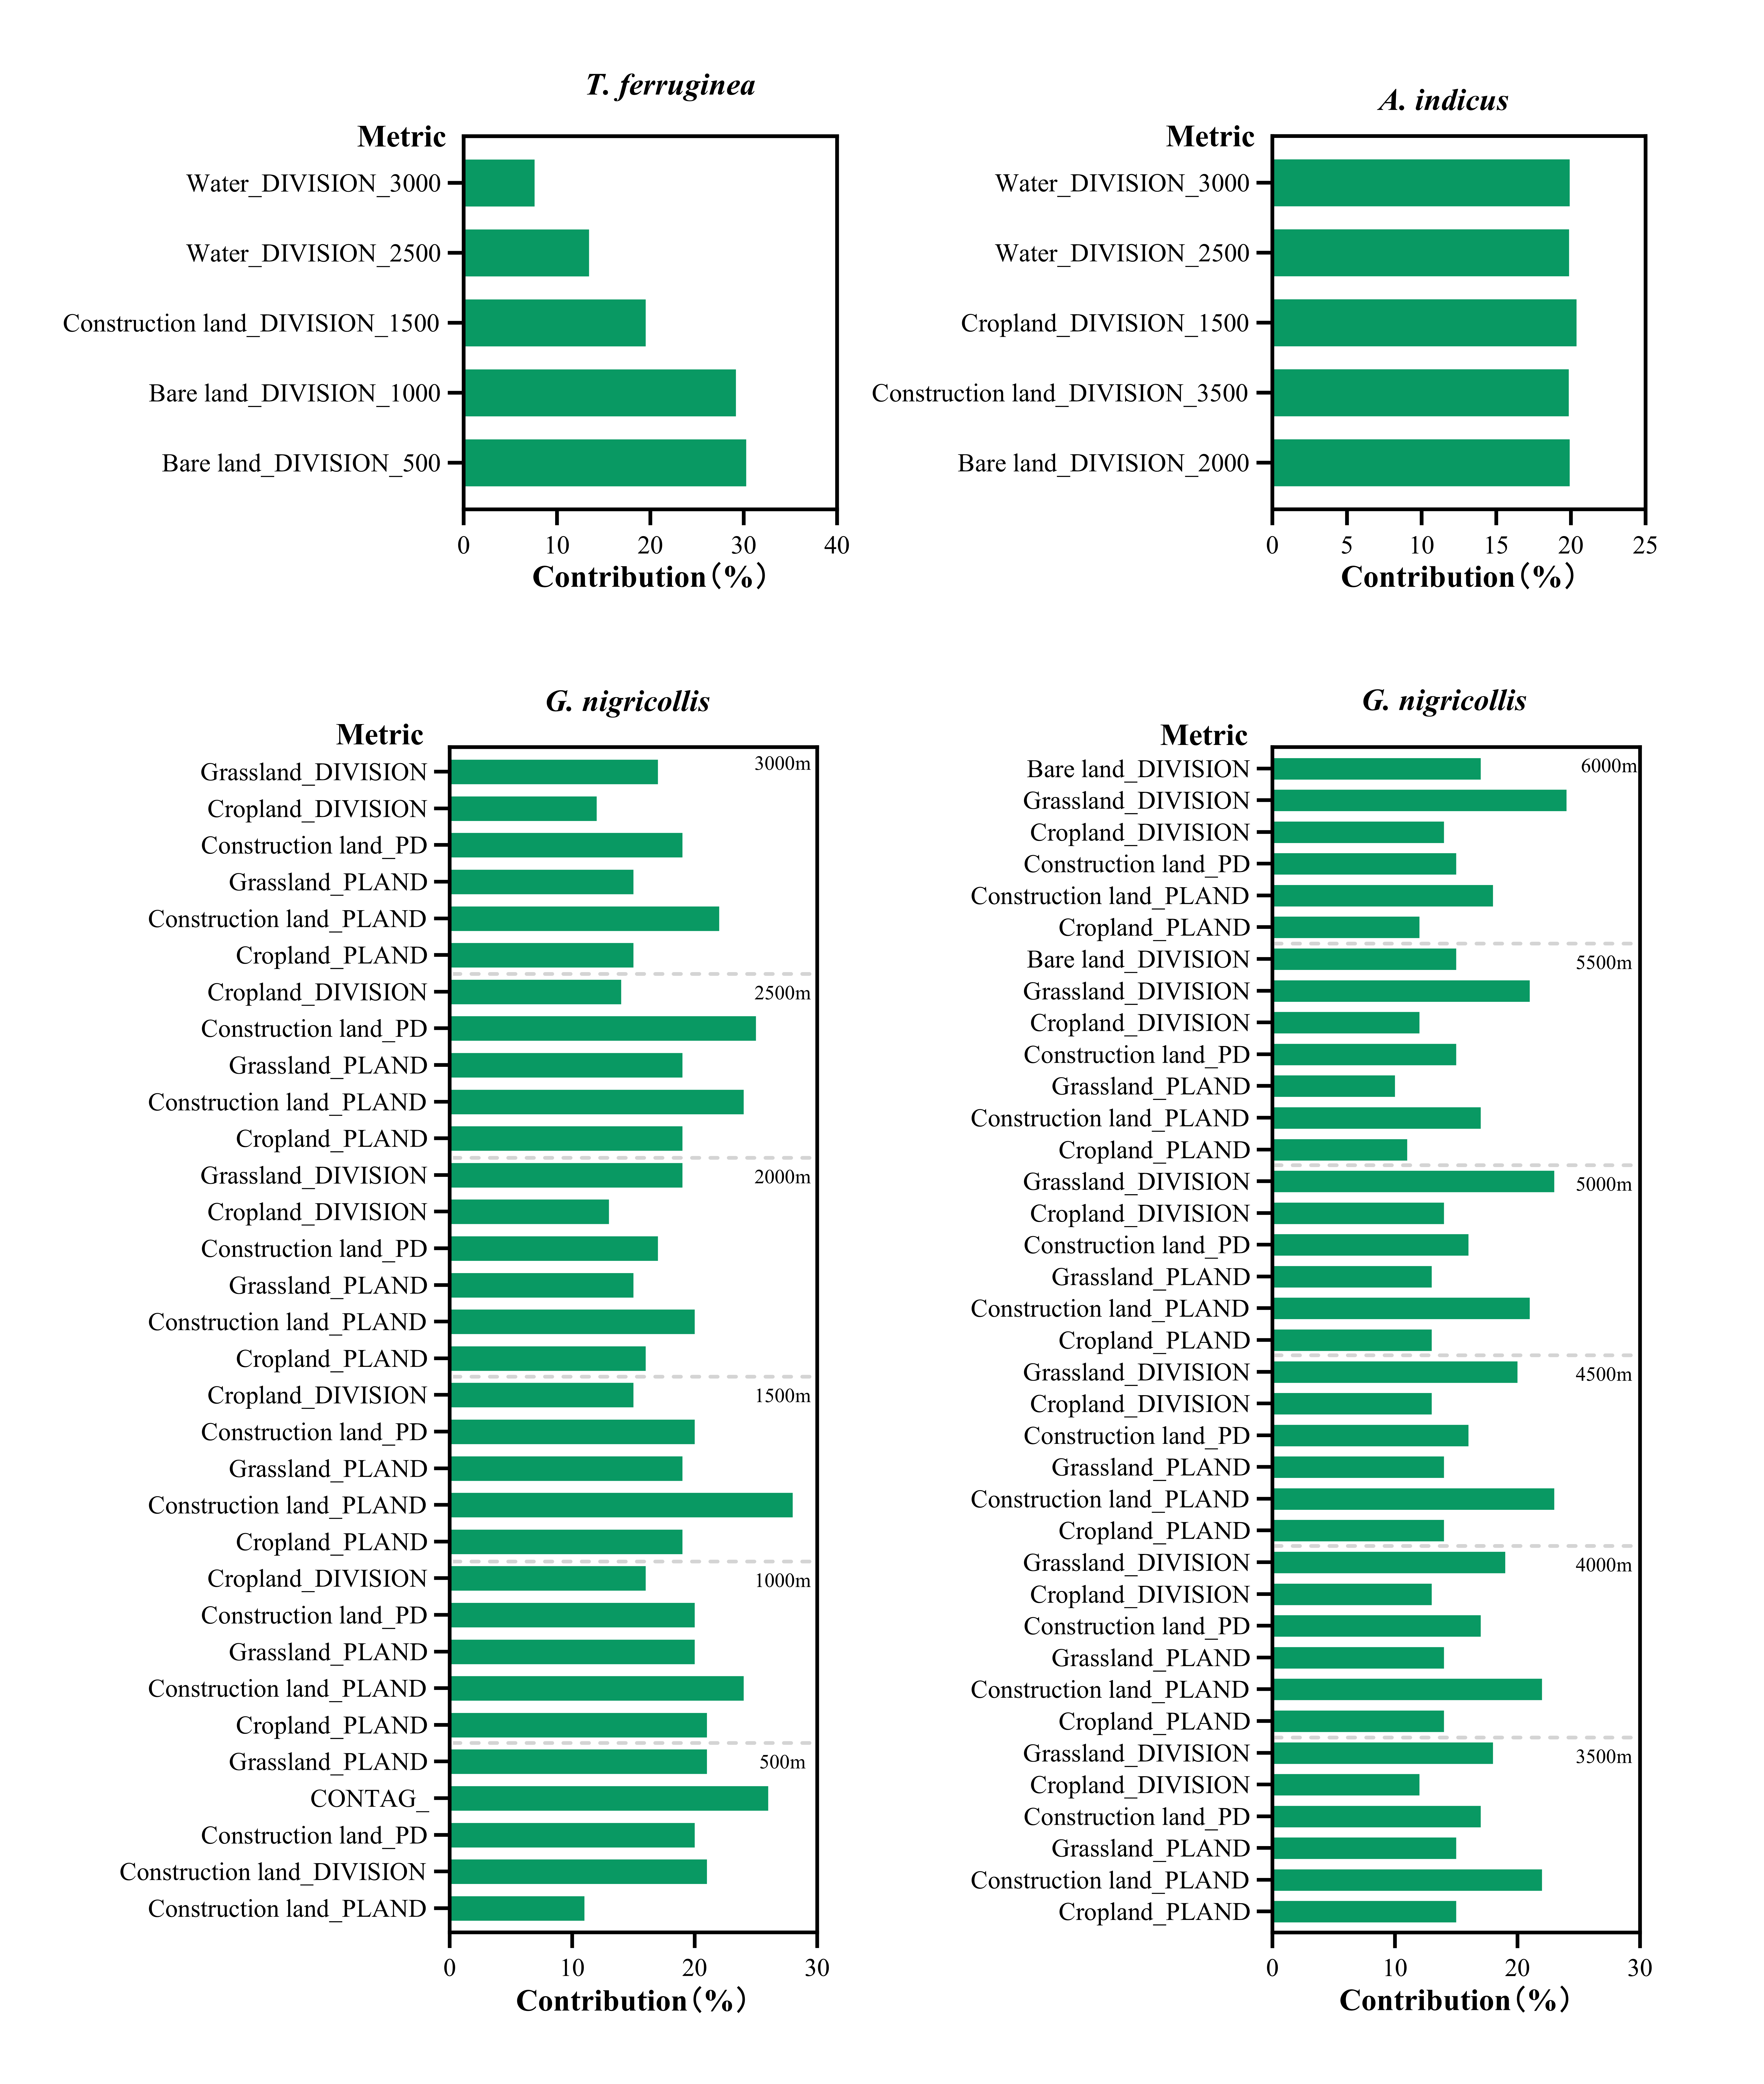


Figure 9. Contributions of landscape metrics to variations of abundance of *T. ferruginea*, *A. indicus* and *G. nigricollis*.


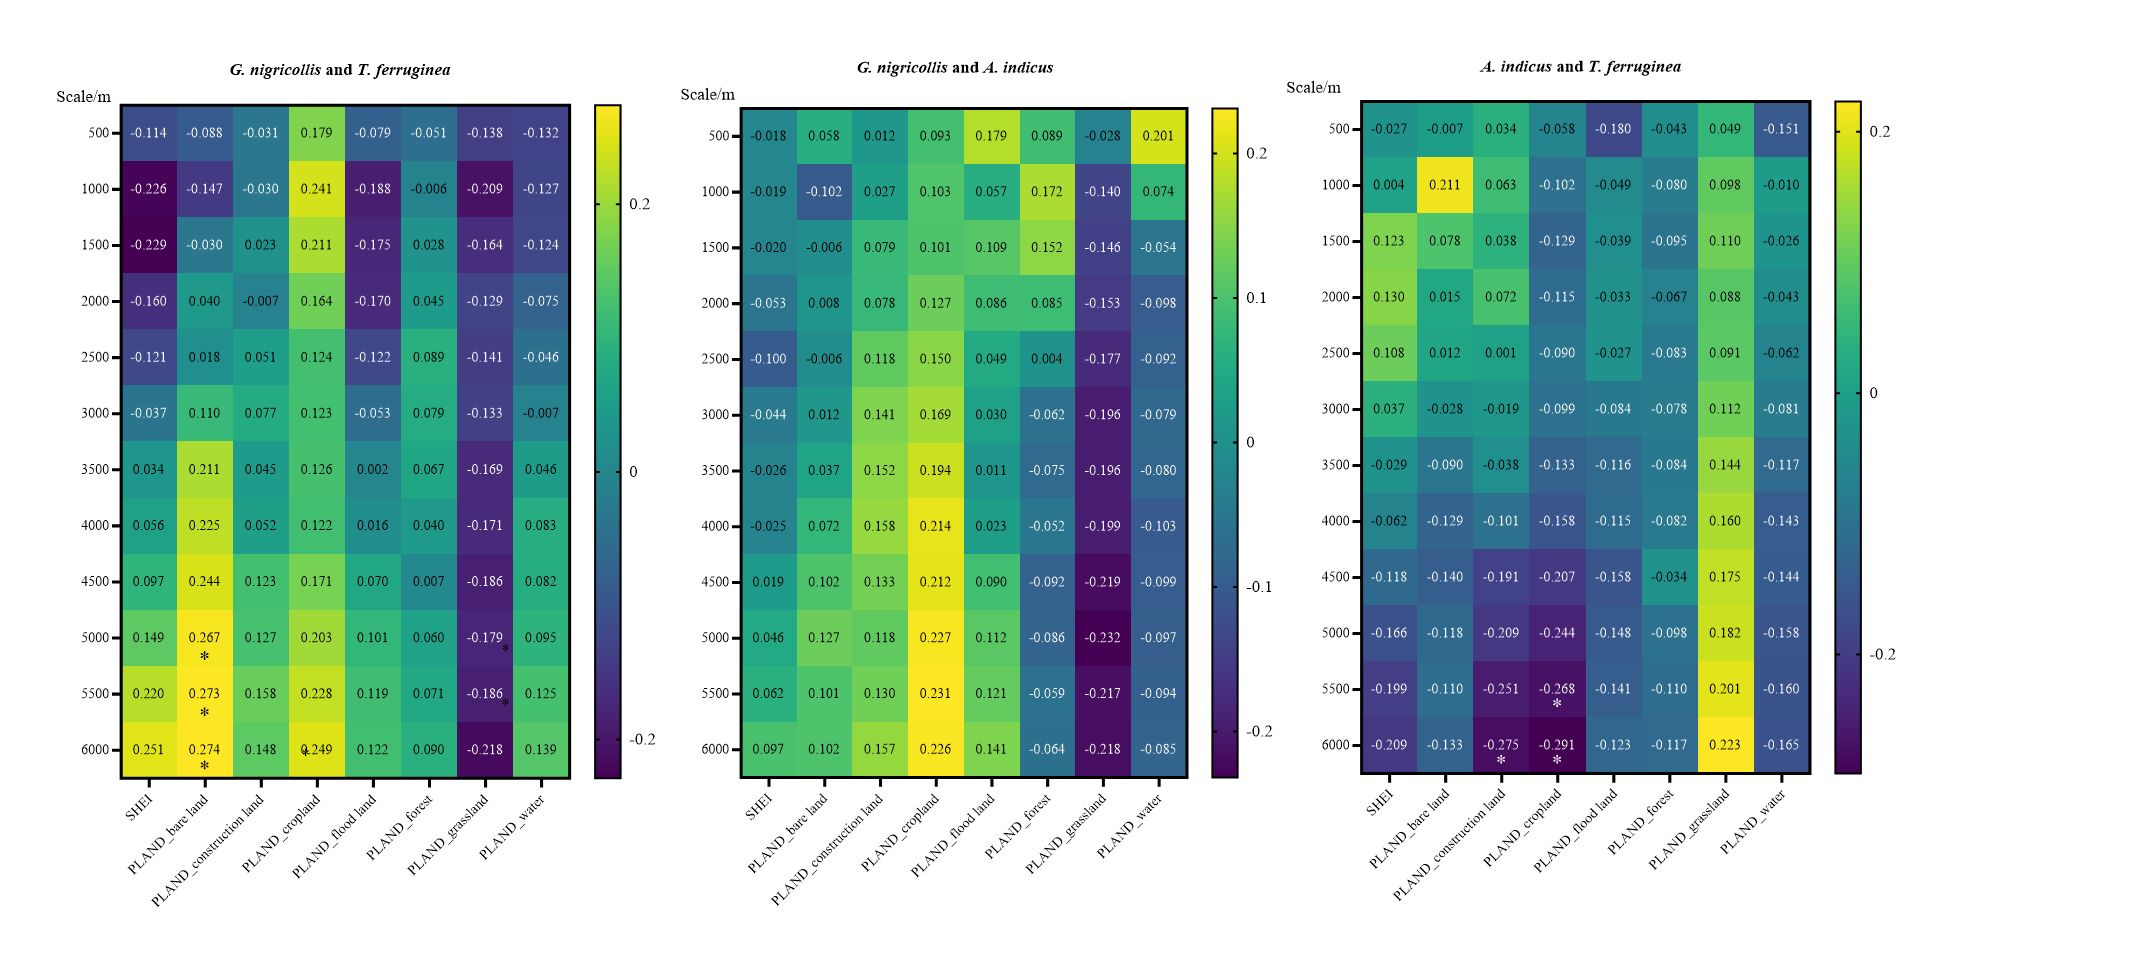


Figure 10. Scale-dependent correlations between landscape matrix composition metrics and coexistence index of three avian species. *: *p* < 0.05.


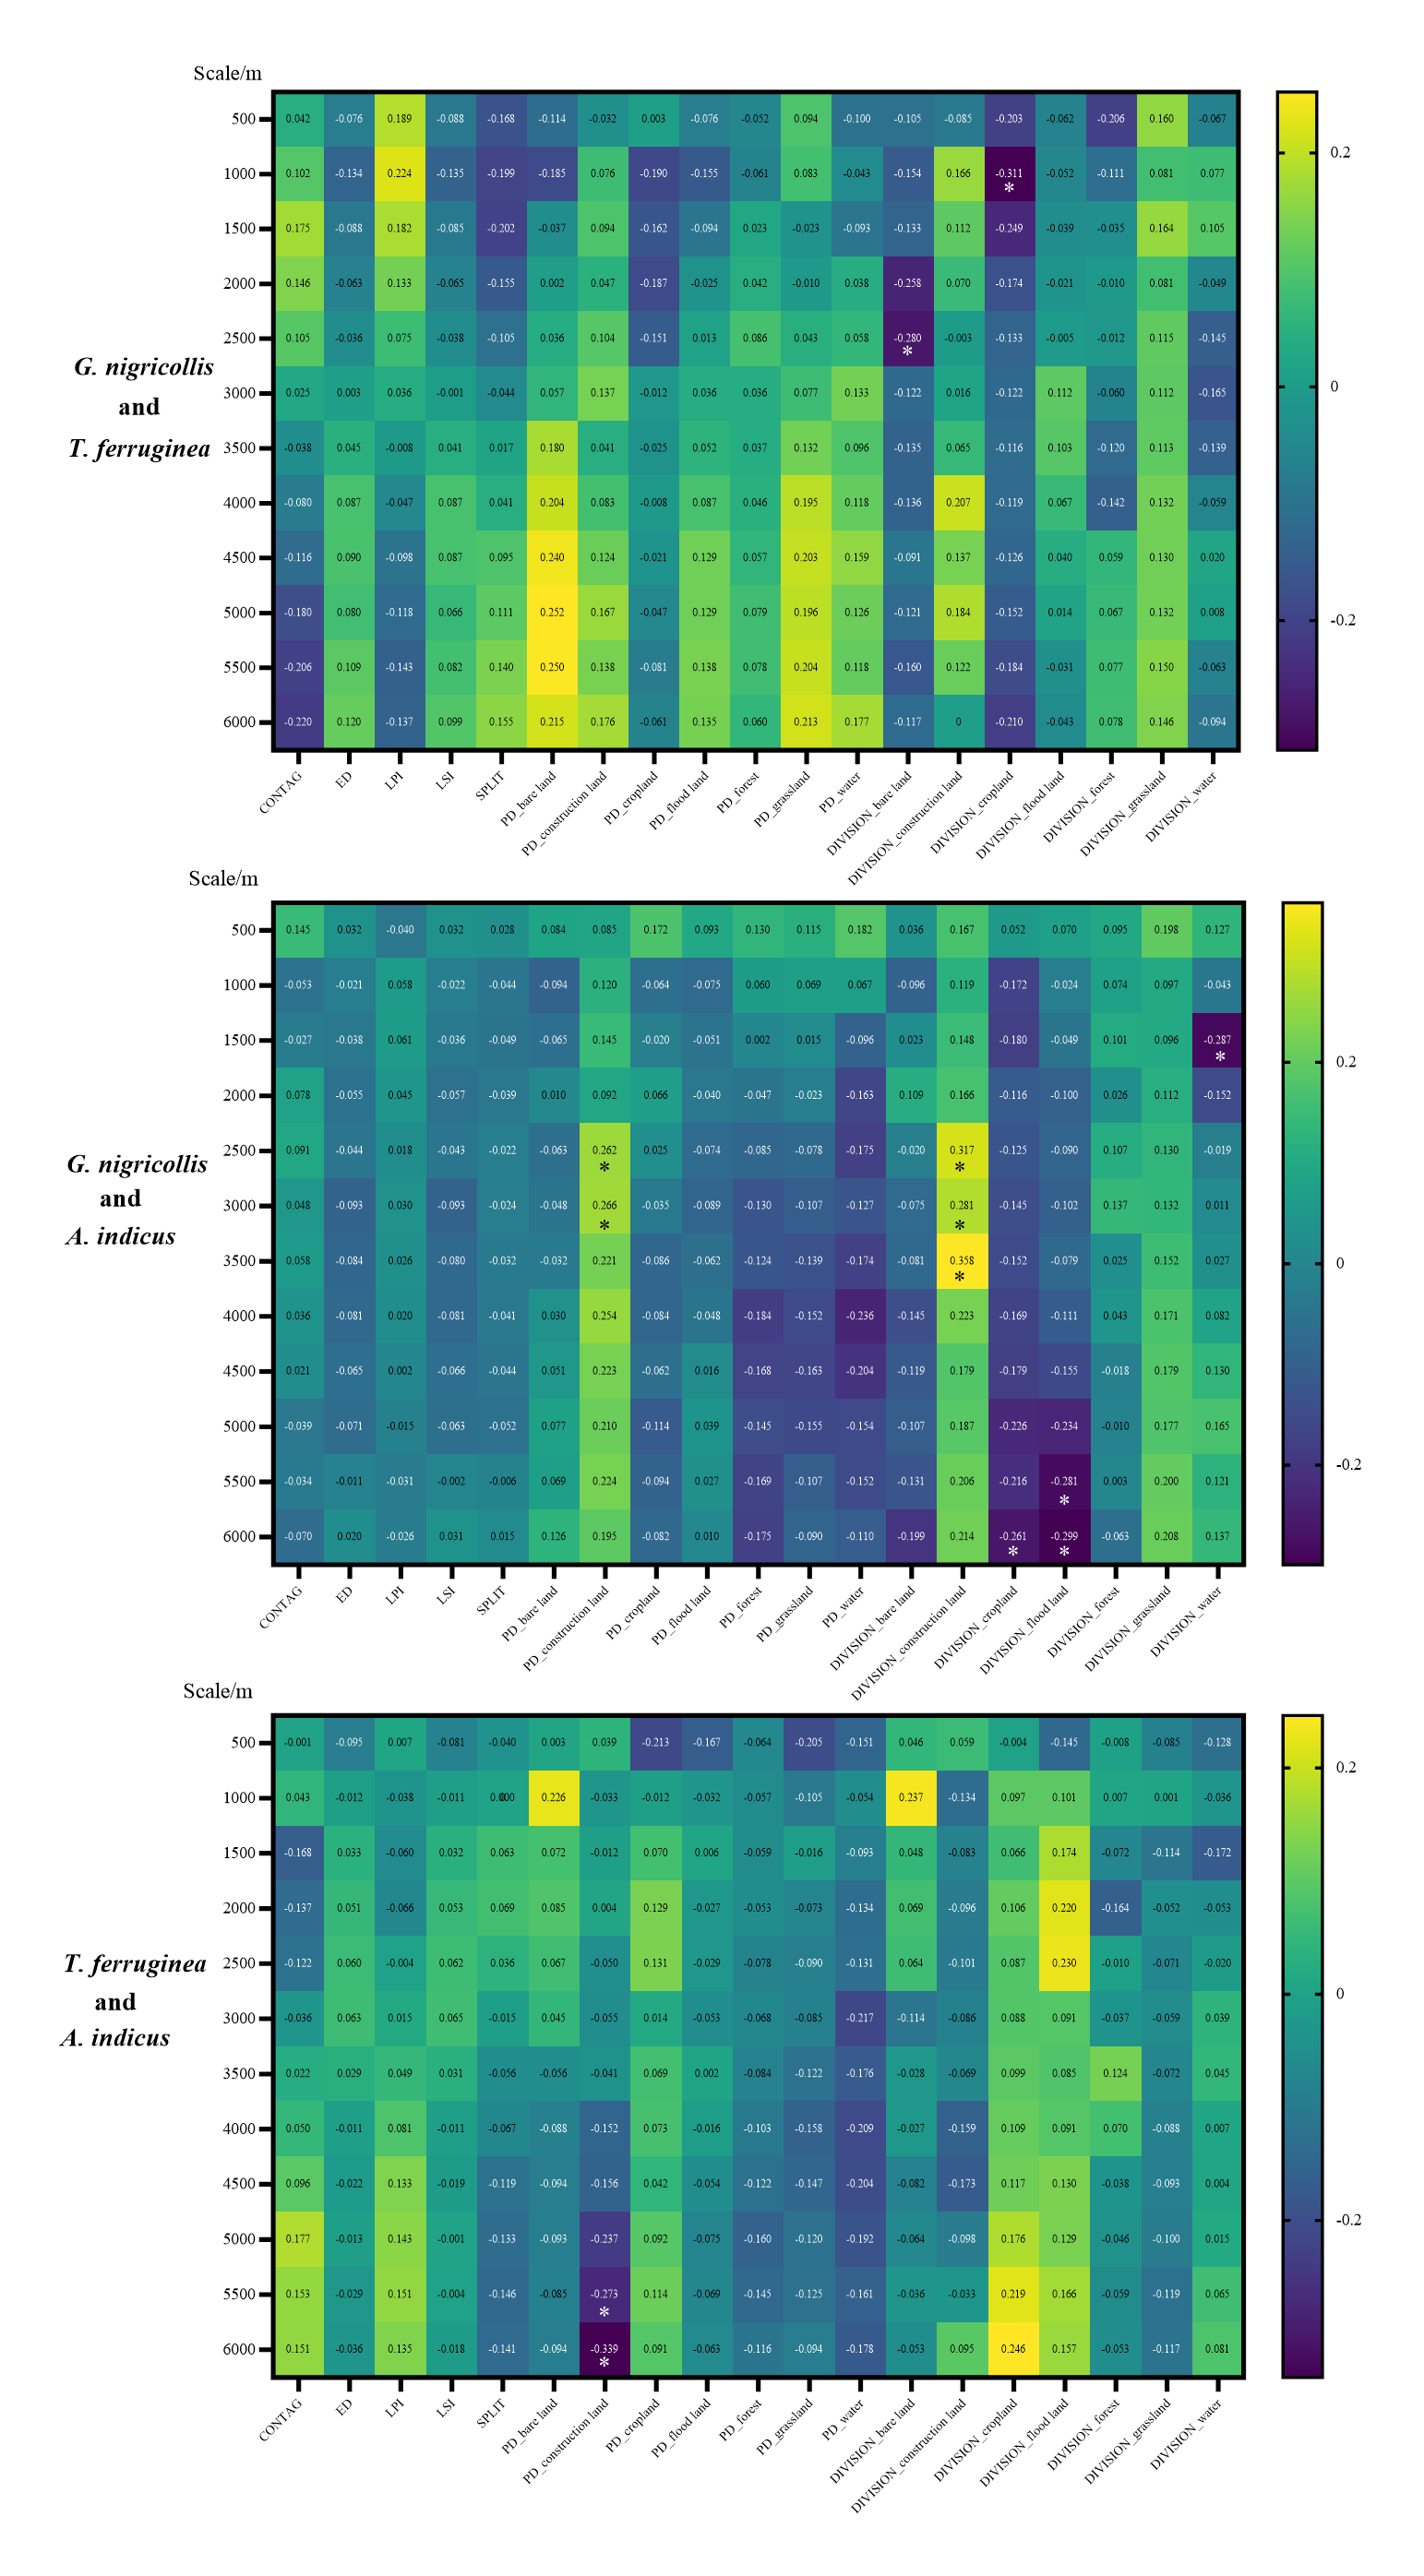


Figure 11. Scale-dependent correlations between landscape matrix configuration metrics and coexistence index of three avian species. *: *p* < 0.05.


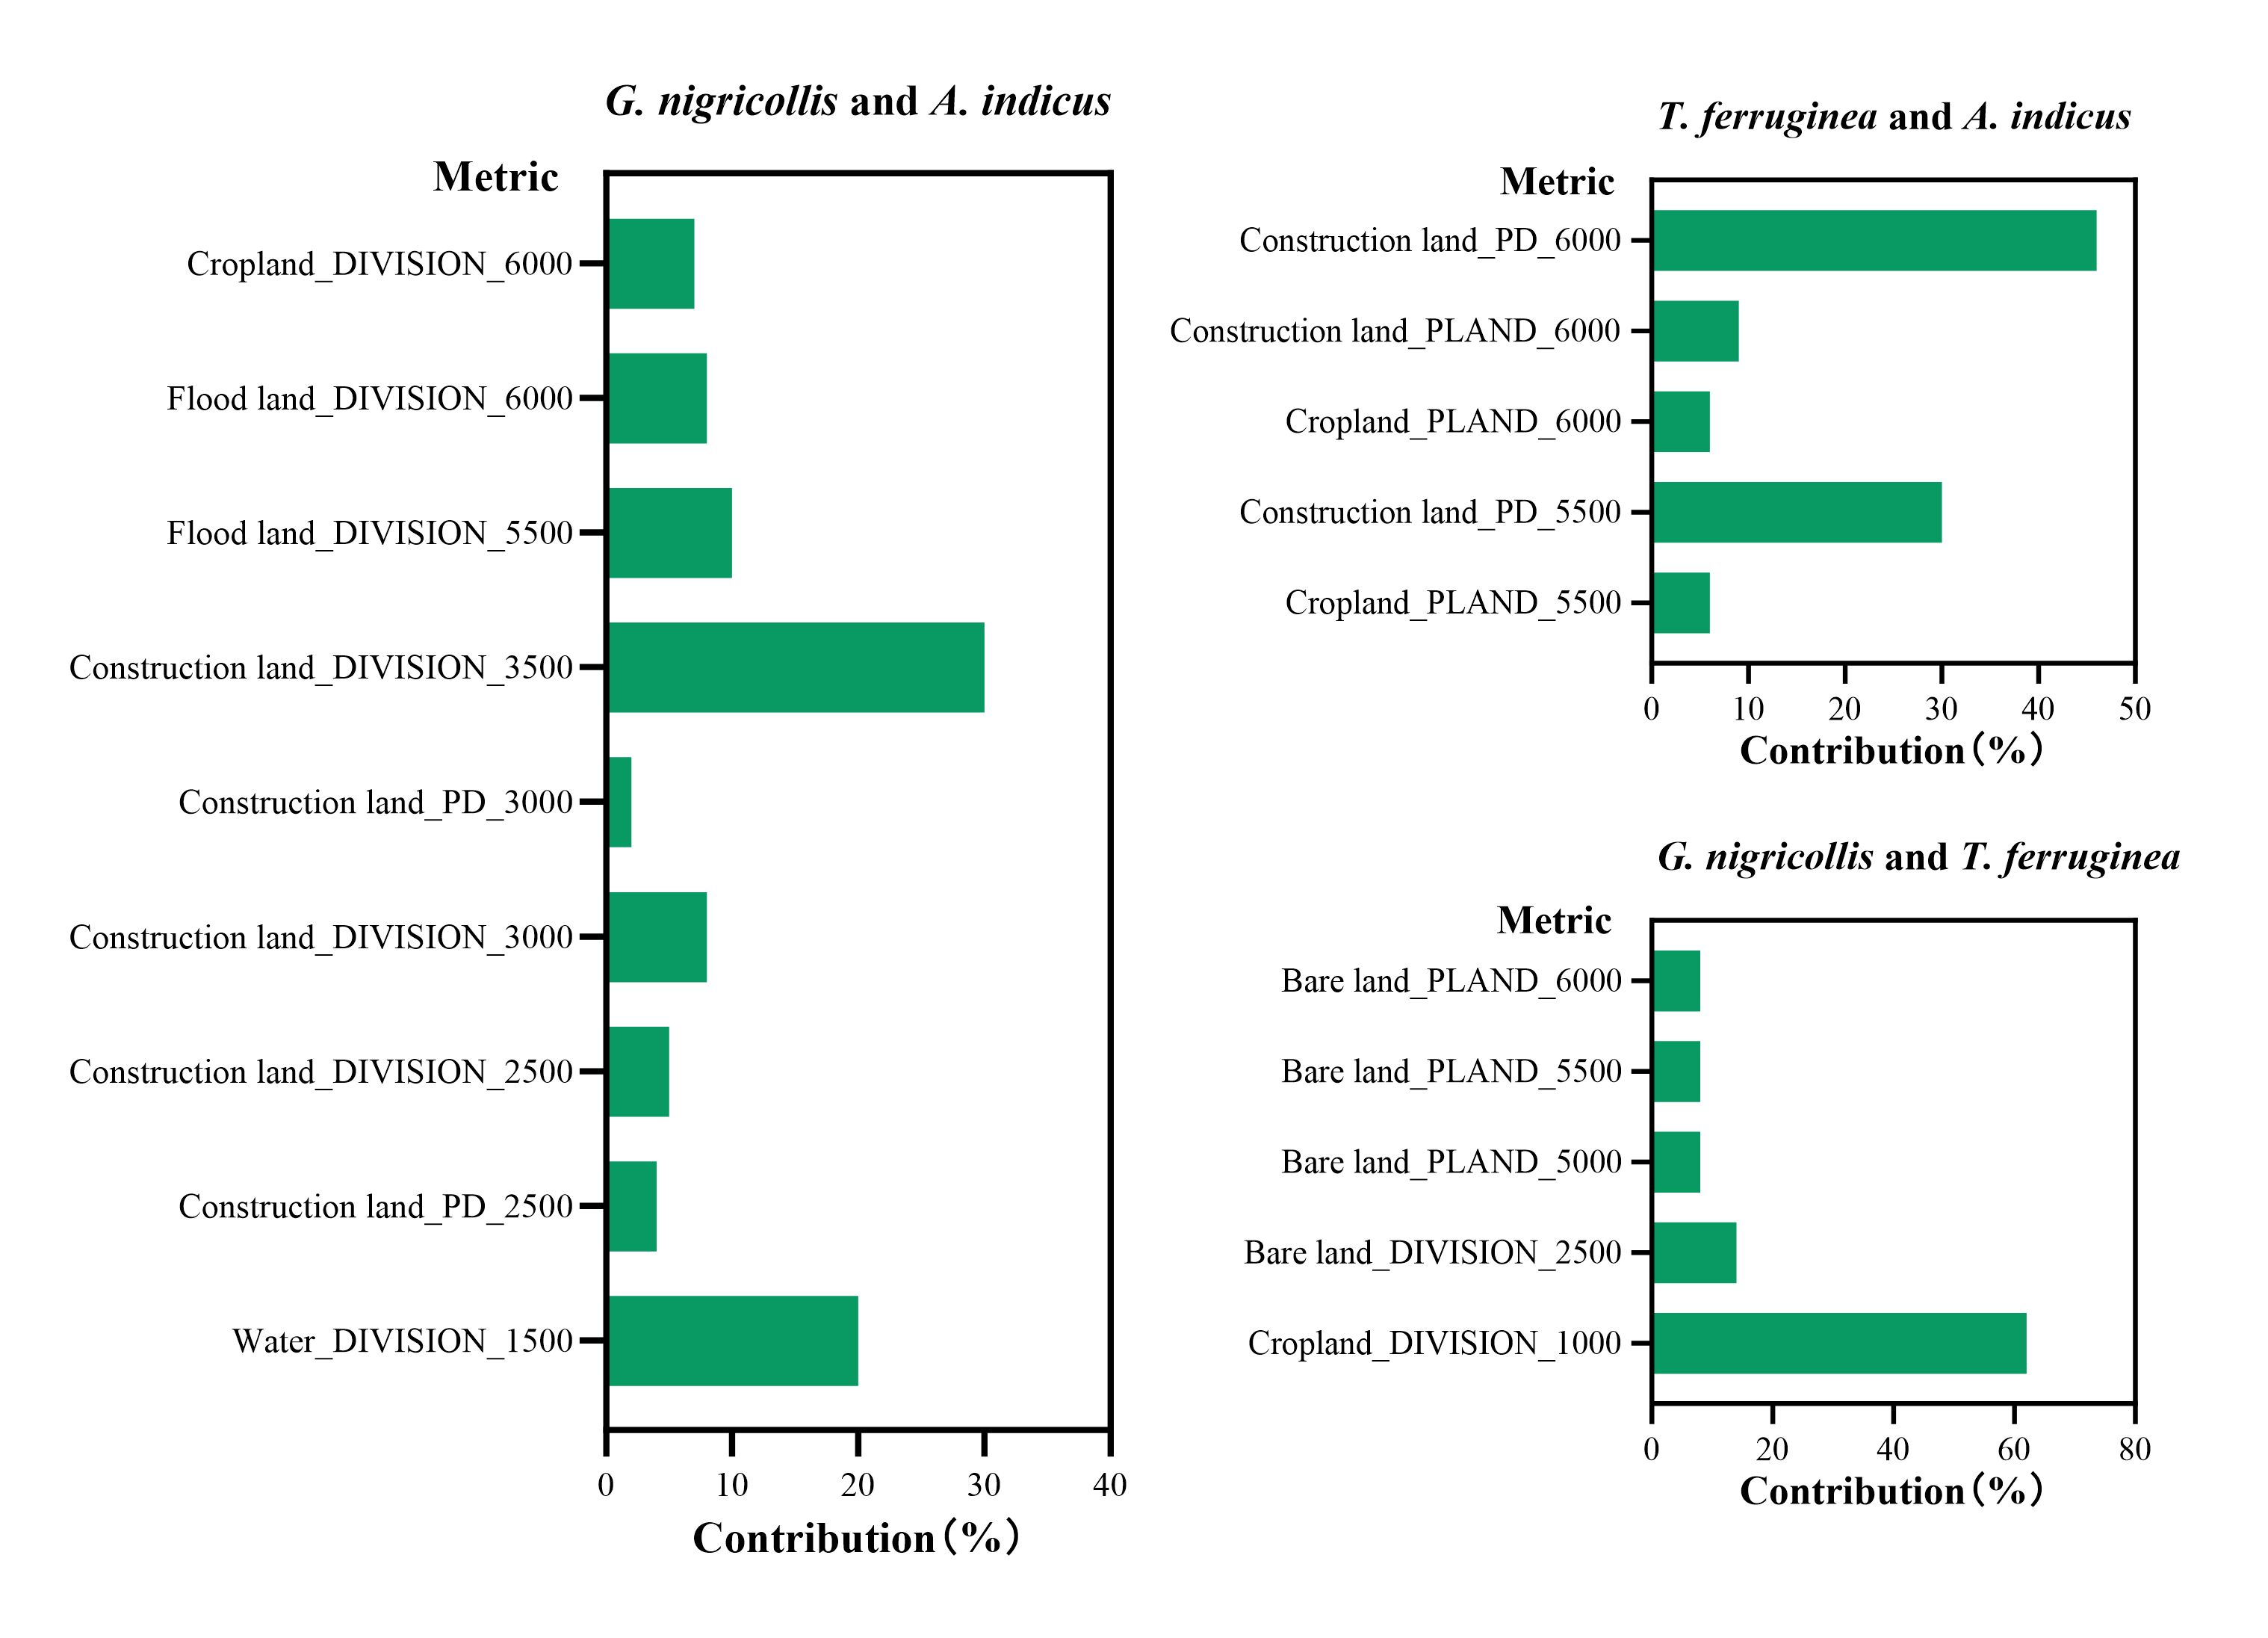


Figure 12. Contributions of landscape metrics to variations of coexistence index among three avian species.


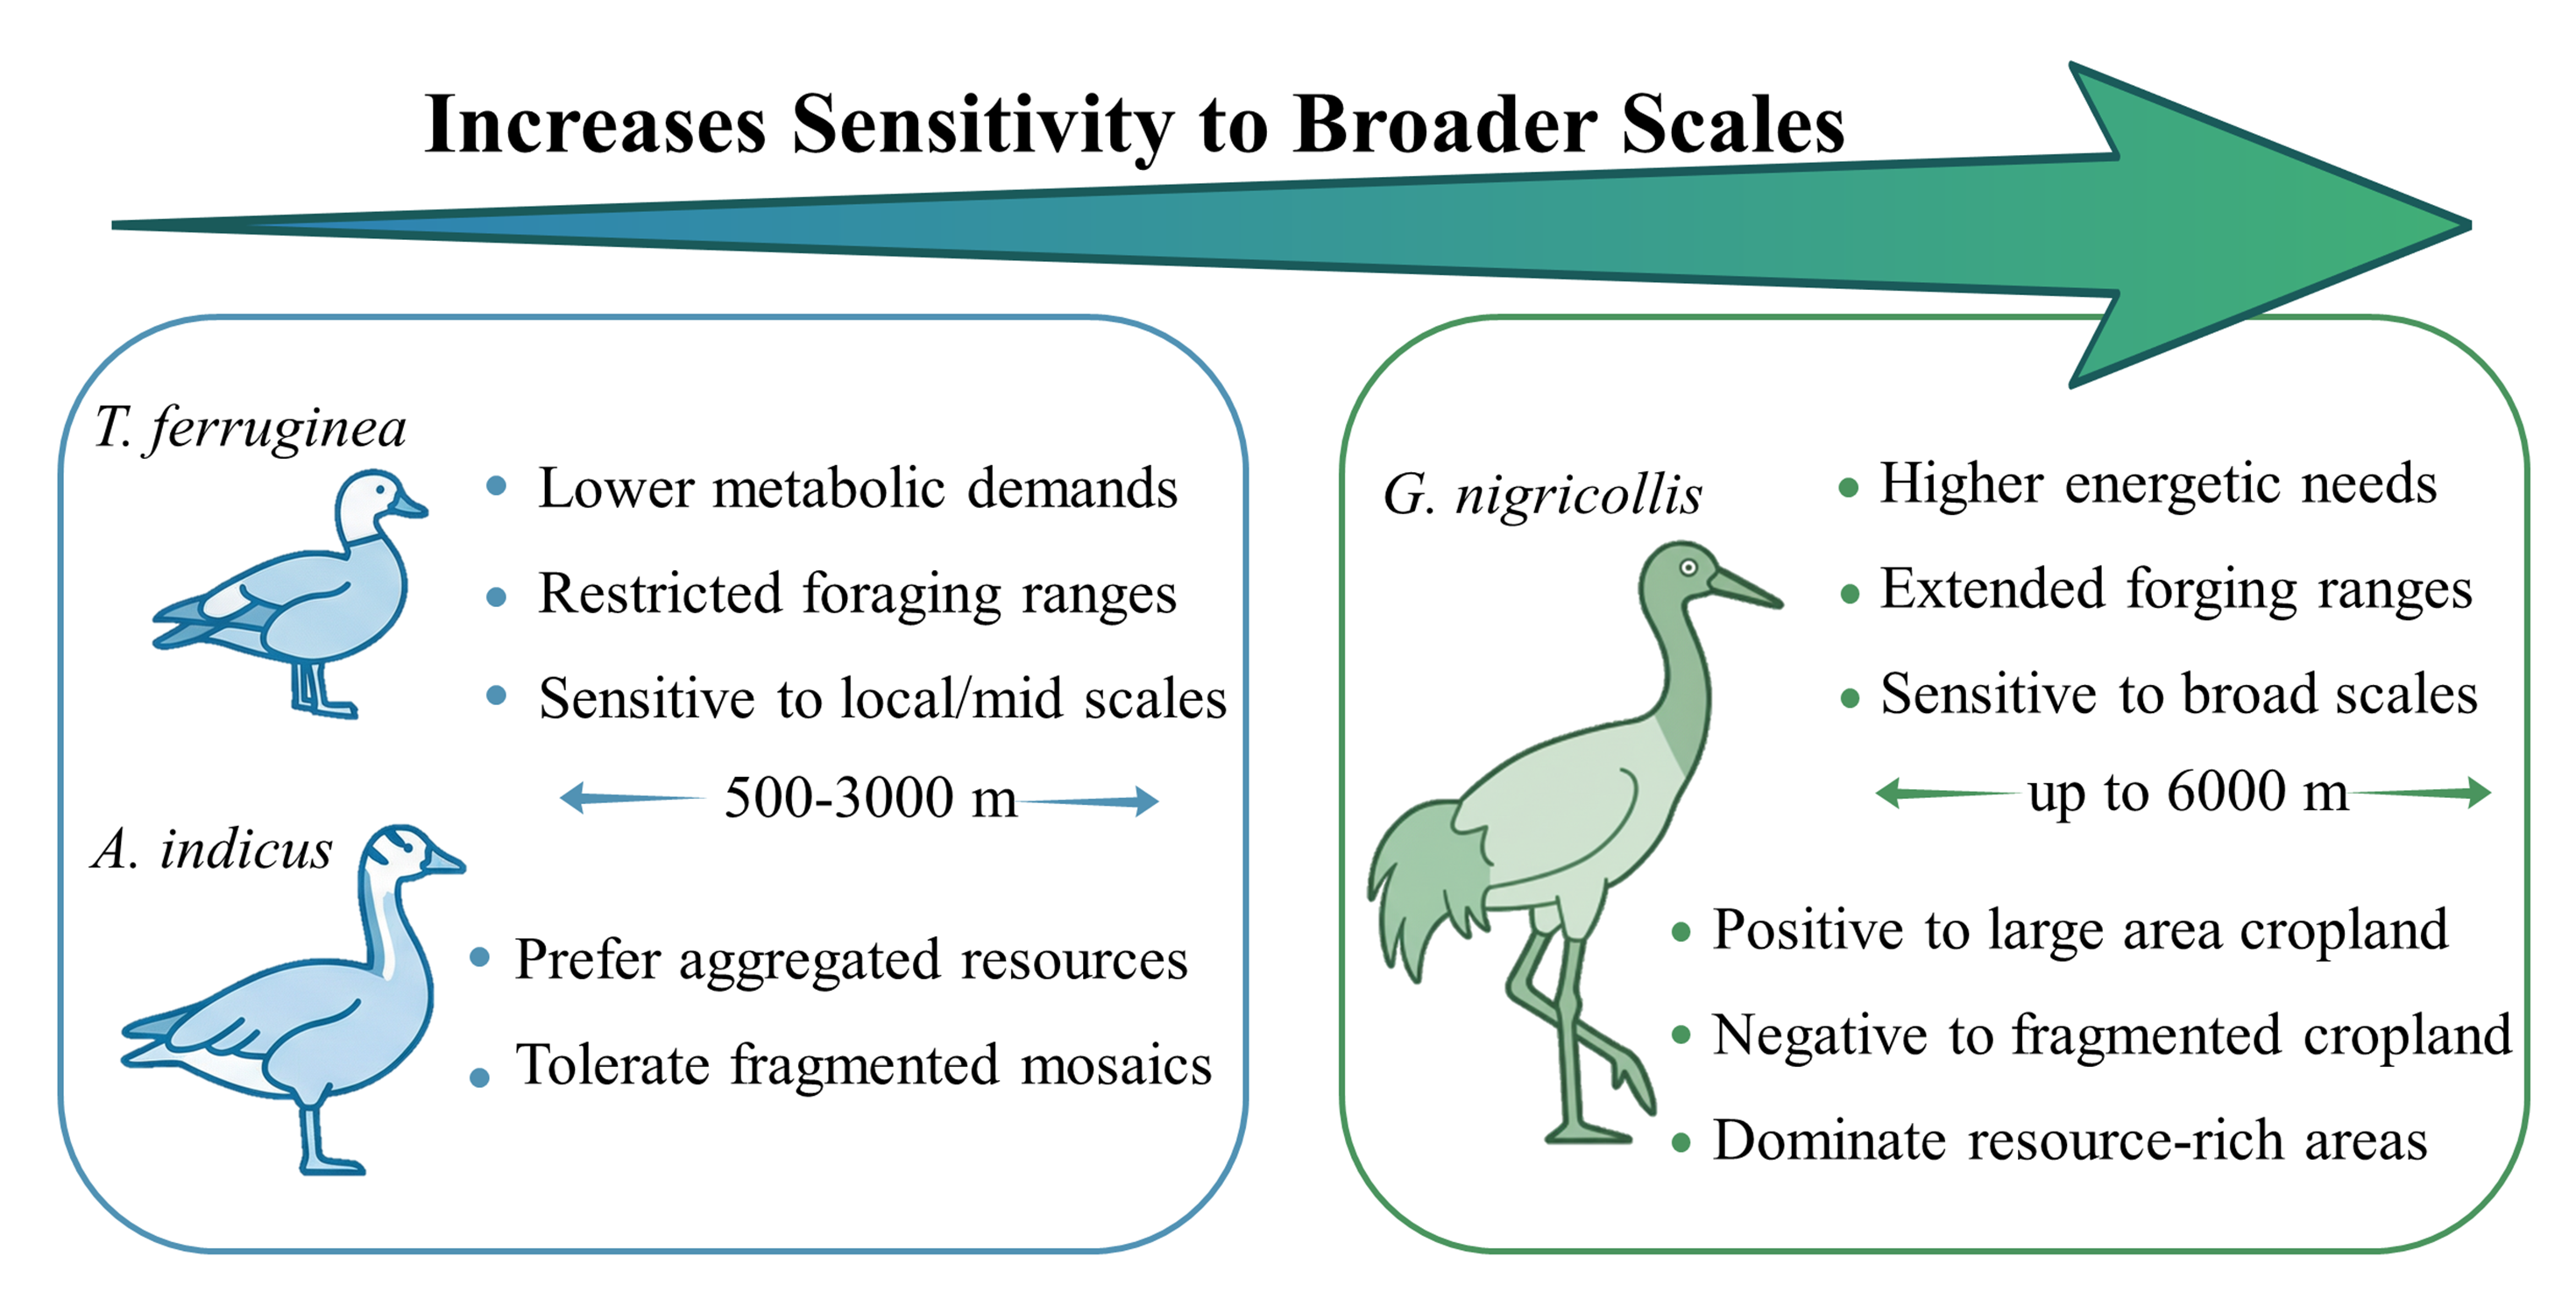


Figure 13. A generalized diagram illustrating scale-dependent niche requirements for landscape matrix with different body size of the three avian species.

# Tables

Table 1. Biological traits of the three avian species

| Types of traits | | *Tadorna ferruginea* | *Anser indicus* | *Grus nigricollis* |
| --- | --- | --- | --- | --- |
| Morphological traits | Beak length (mm) | 47 | 49.9 | 124.4 |
| Beak width (mm) | 18.6 | 19.8 | 11.7 |
| Tarsus length (mm) | 54.5 | 70.8 | 239.8 |
| Wing length (mm) | 355.5 | 437.8 | 579.2 |
| Height (cm) | 63 | 70 | 150 |
| Mass (g) | 1235.03 | 2212.55 | 5999.99 |
| Behavior traits | Foraging | Plants, aquatic plants, fish, shrimp, and insects | Plant leaves, roots, stems, tubers, seeds and algae | Agricultural crops, aquatic plants, fish, shrimp, and insects |
|  | Breeding period | April to June | April to June | May to July |
|  | Breeding strategy | Monogamous | Monogamous | Monogamous |

Table 2. Metrics selection of landscape level and class level

| Level | Metric | Abbreviation | Type |
| --- | --- | --- | --- |
| Landscape level | Largest Patch Index | LPI | Landscape configuration |
|  | Edge Density | ED | Landscape configuration |
|  | Landscape Shape Index | LSI | Landscape configuration |
|  | Contagion Index | CONTAG | Landscape configuration |
|  | Splitting Index | SPLIT | Landscape configuration |
|  | Shannon's Evenness Index | SHEI | Landscape composition |
| Class level | Percentage of Landscape | PLAND | Landscape composition |
|  | Patch Density | PD | Landscape configuration |
|  | Landscape Division Index | DIVISION | Landscape configuration |
